# Supplementary material
Source: PubMed Central journal article supplement (PMC11071792)

Supplementary figures

**Supplementary figure SF01A-F.** Establishment of the method for single cell reporter gene analysis. A) Representative photomicrographs of transfected cells (red) and SRF-positive cells (green). B) Quantitative analysis of positive (constitutive active promoter) and negative (without promoter) controls. N=12. C) Effect of transfection on basal SRF-activity. N=18. D) Stability of cell number, size, morphology and RFP-signal over time under control conditions. N=18. E and F) Mock-transfected HEK293 and HK-2 cells are responsive to EGF but not to All, in agreement with endogenous EGFR expression but a lack of AT1R expression. N=18.

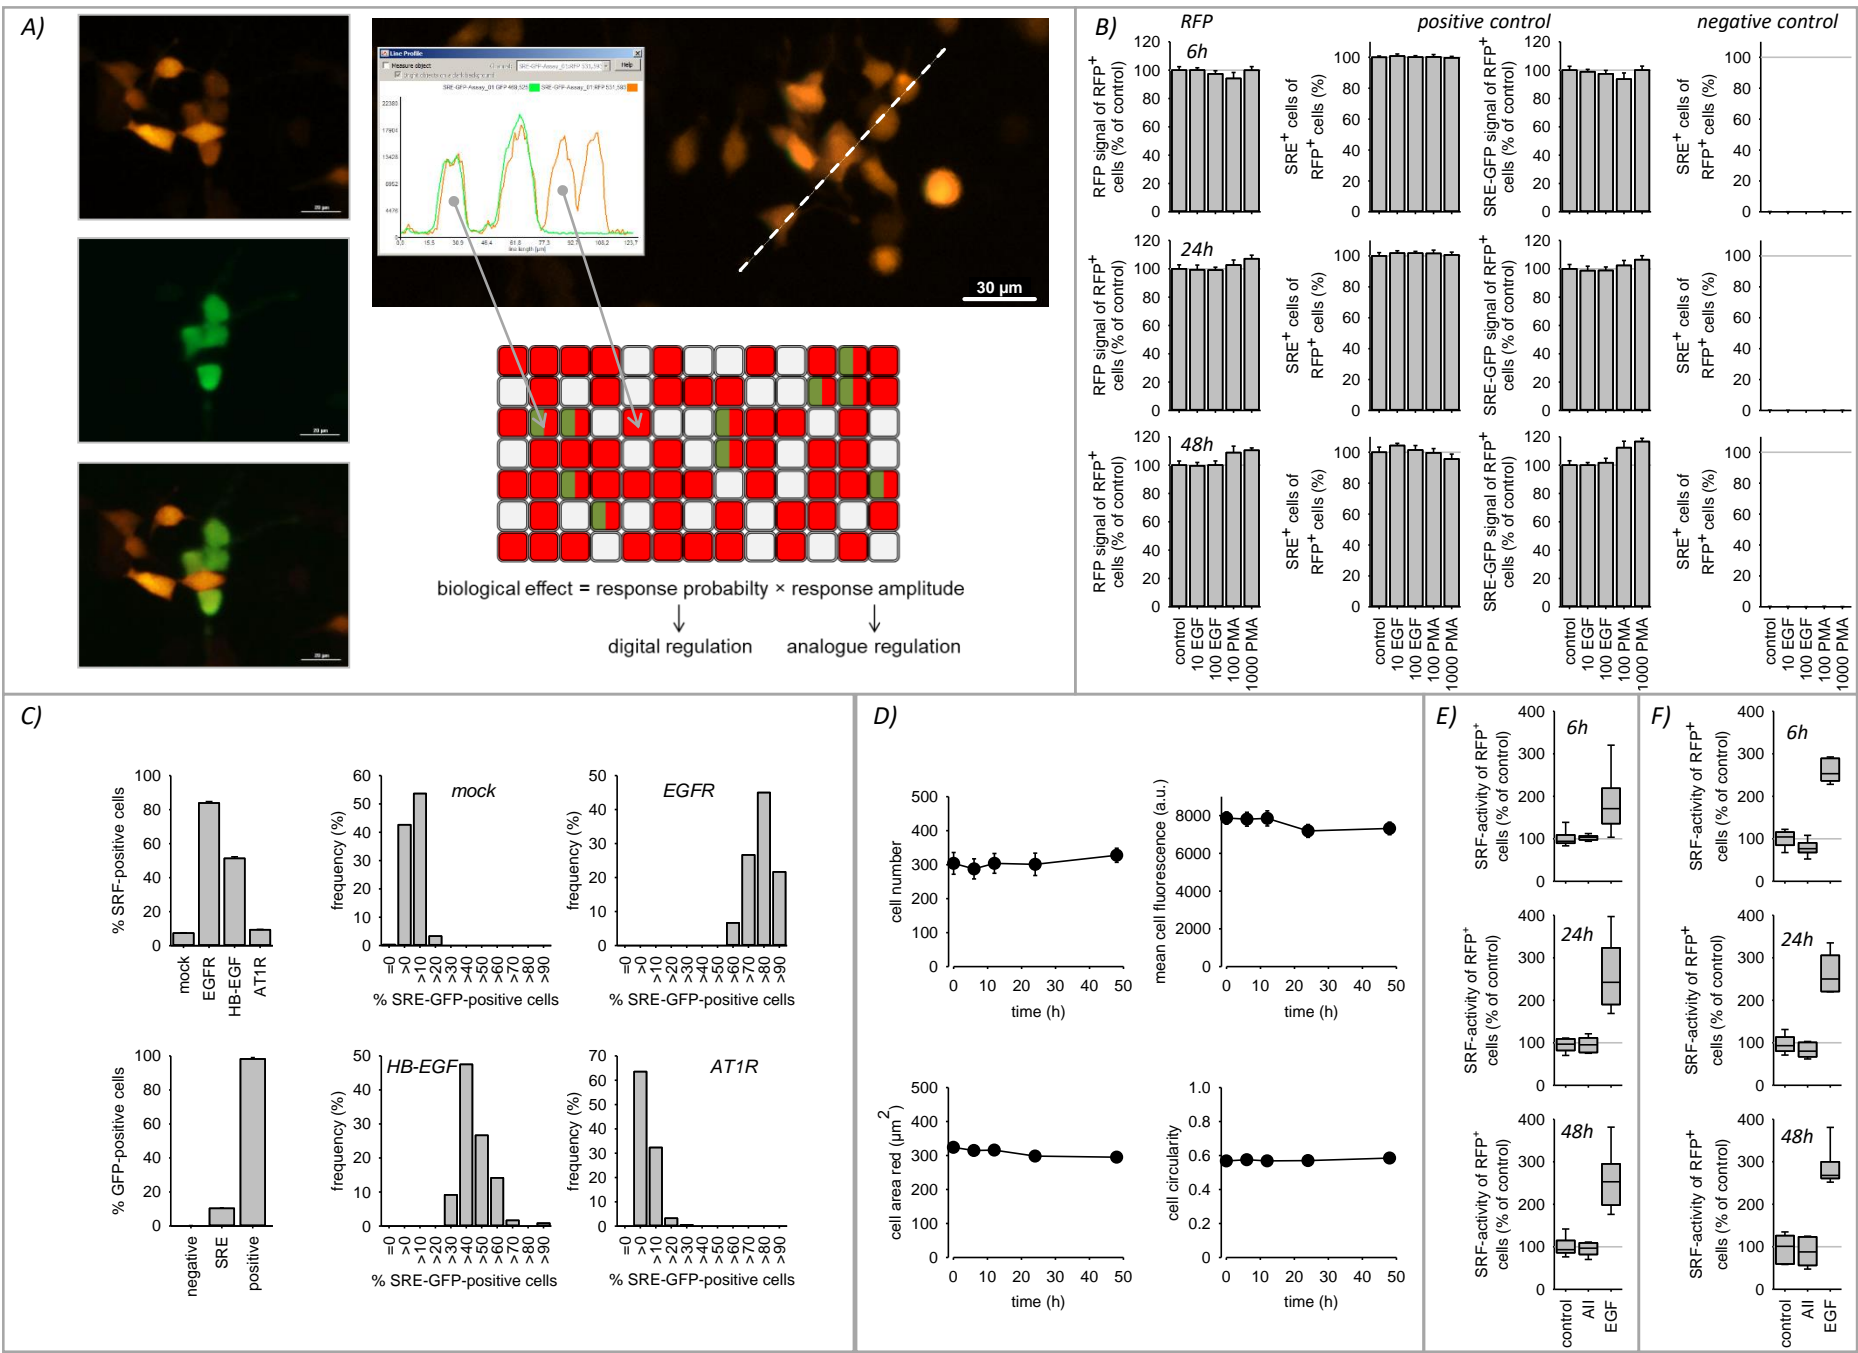

Supplementary figure SF01G. Analysis routine and parameters during single cell gene reporter assays.

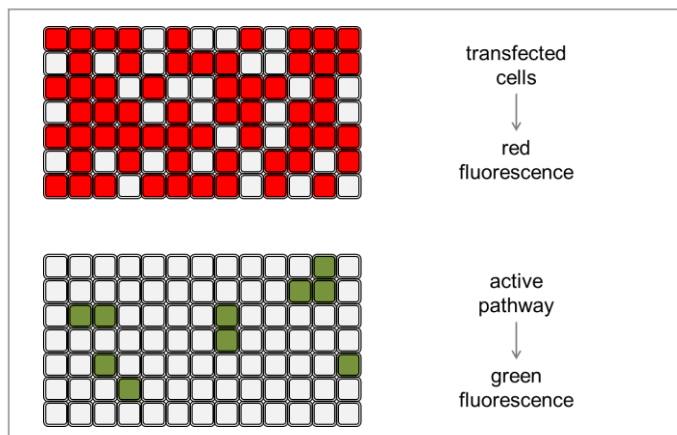

| measure                        | biology                                    |
|--------------------------------|--------------------------------------------|
| red cell number                | transfection control                       |
| red cell intensity             | stability control   protein synthesis rate |
| green intensity of red cells   | gross effect                               |
| green intensity of green cells | analogue regulation                        |
| number of green cells          | digital regulation                         |
| red cell area                  | hypertrophy                                |
| red cell circularity           | shape changes                              |
| green cell circularity         | shape changes related to signalling        |

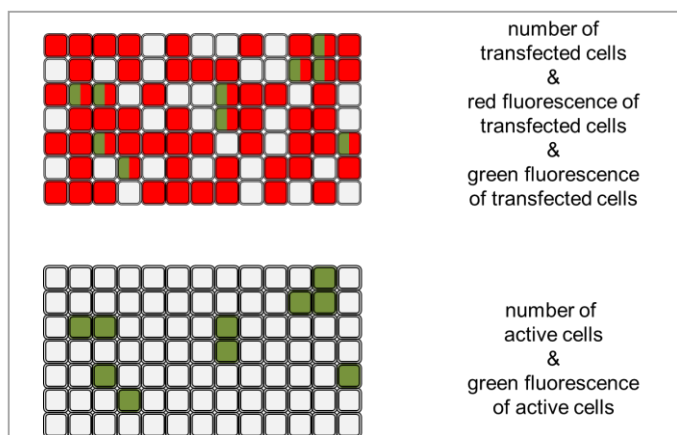

$$\Delta \text{ green intensity of RFP}^+ \text{ cells} = \Delta \text{ mean green intensity} \times \Delta \text{ size}$$

$$= \Delta \text{ integral green of RFP}^+ \text{ cells}$$

$$\Delta \text{ green intensity of GFP}^+ \text{ cells} = \Delta \text{ mean green intensity} \times \Delta \text{ size}$$

$$= \Delta \text{ integral green of GFP}^+ \text{ cells}$$

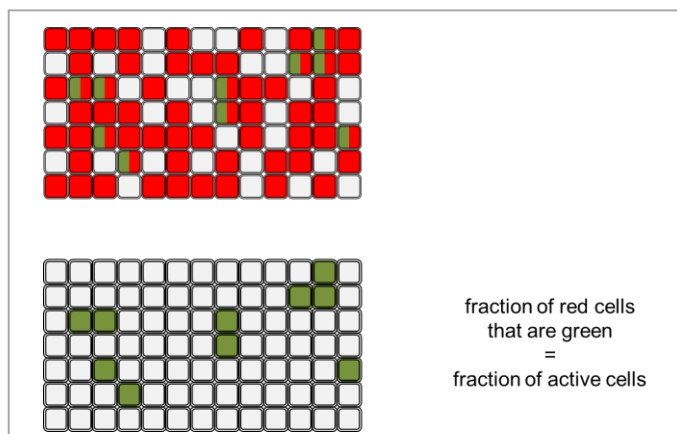

**Supplementary figure SF02.** A) Time-course of SRF activation by EGF (10  $\mu\text{g/l}$ ) in HEK293 cells. N=30. B) Concentration-response curve of SRF activation by EGF after 24h in HEK293 cells. t=24h. N=24. C-G) Pharmacological identification of pathways involved in EGFR-induced SRF-activation after 24h. N=24. C) Inhibition of EGFR-kinase by 100 nmol/l AG1478, D) ERK1/2-phosphorylation by 1  $\mu\text{mol/l}$  U0126, E) actin polymerization by 100 nmol/l latrunculin B (LatB), F) Rho-kinase (ROCK) activity by 10  $\mu\text{mol/l}$  Y27632 and G) protein kinase C activity by 100 nmol/l bisindolylmaleimide (BIM). H) Time-course of SRF activation by PMA (1  $\mu\text{mol/l}$ ) in HEK293 cells. N=24. I) Concentration-response curve of SRF activation by EGF in HEK293 cells. N=18. J) Inhibition of EGFR-kinase by 100 nmol/l AG1478 (N=18), D) ERK1/2-phosphorylation by 1  $\mu\text{mol/l}$  U0126 (N=18), E) actin polymerization by 100 nmol/l latrunculin B (LatB; N=18), F) Rho-kinase (ROCK) activity by 10  $\mu\text{mol/l}$  Y27632 (N=24) and G) protein kinase C activity by 100 nmol/l bisindolylmaleimide (BIM, N=24). \* =  $p < 0.05$  versus control, if not indicated otherwise.

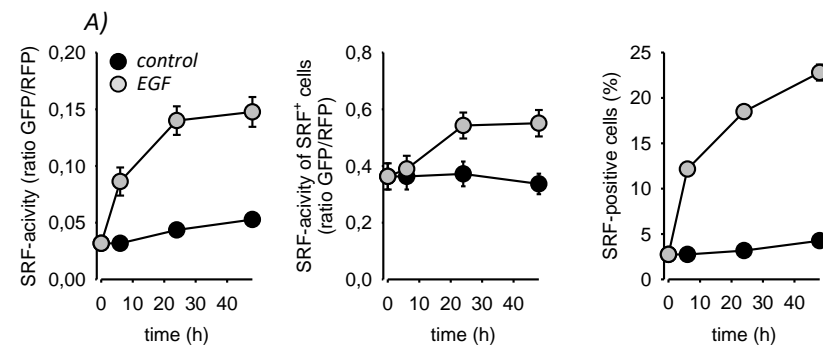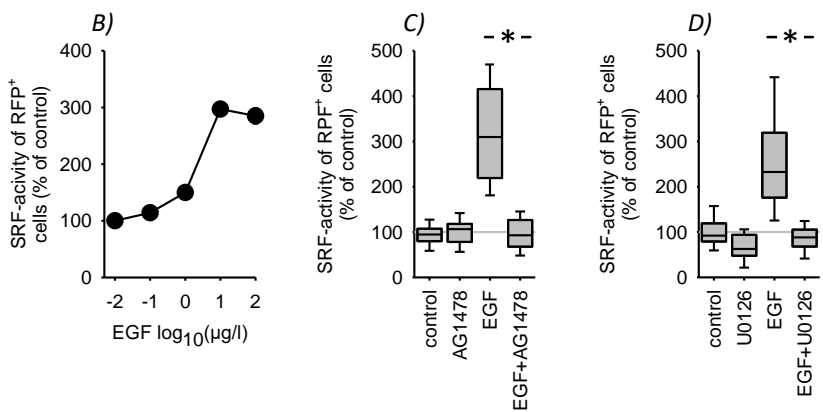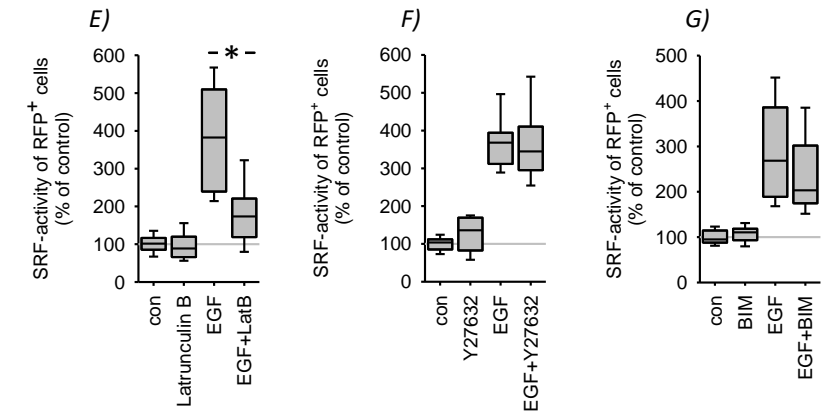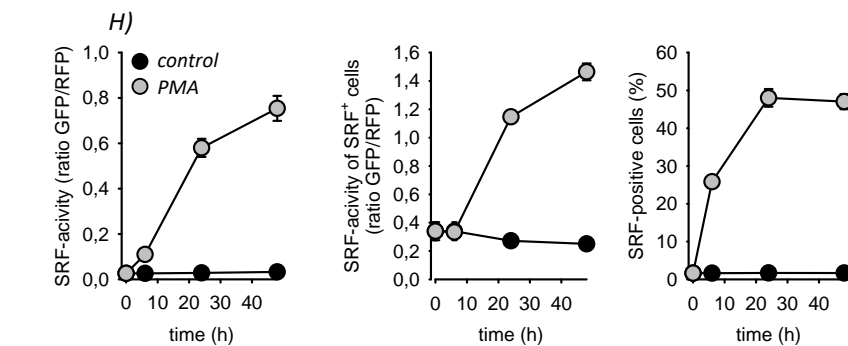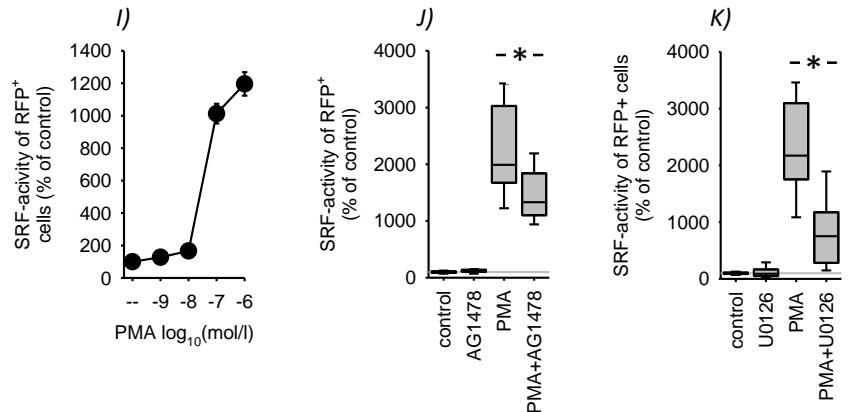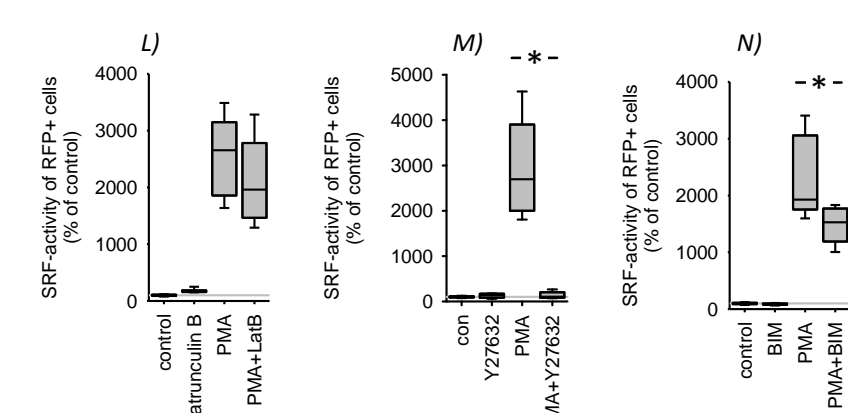

**Supplementary figure SF03.** A) Time-course of SRF activation by EGF (10  $\mu\text{g}/\text{l}$ ) in HK-2 cells. N=30. B) Concentration-response curve of SRF activation by EGF in HEK293 cells. t=24h. N=12. C-G) Pharmacological identification of pathways involved in EGFR-induced SRE-activation. t=24h. N=24. C) Inhibition of EGFR-kinase by 100 nmol/l AG1478, D) ERK1/2-phosphorylation by 1  $\mu\text{mol}/\text{l}$  U0126, E) actin polymerization by 100 nmol/l latrunculin B (LatB), F) Rho-kinase (ROCK) activity by 10  $\mu\text{mol}/\text{l}$  Y27632 and G) protein kinase C activity by 100 nmol/l bisindolylmaleimide (BIM). \* =  $p < 0.05$ . H) Time-course of SRF activation by PMA (1  $\mu\text{mol}/\text{l}$ ) in HEK293 cells. N=18. I) Concentration-response curve of SRF activation by EGF in HEK293 cells. N=18. J) Inhibition of EGFR-kinase by 100 nmol/l AG1478 (N=18), D) ERK1/2-phosphorylation by 1  $\mu\text{mol}/\text{l}$  U0126 (N=18), E) actin polymerization by 100 nmol/l latrunculin B (LatB; N=18), F) Rho-kinase (ROCK) activity by 10  $\mu\text{mol}/\text{l}$  Y27632 (N=18) and G) protein kinase C activity by 100 nmol/l bisindolylmaleimide (BIM, N=24). \* =  $p < 0.05$  versus control, if not indicated otherwise.

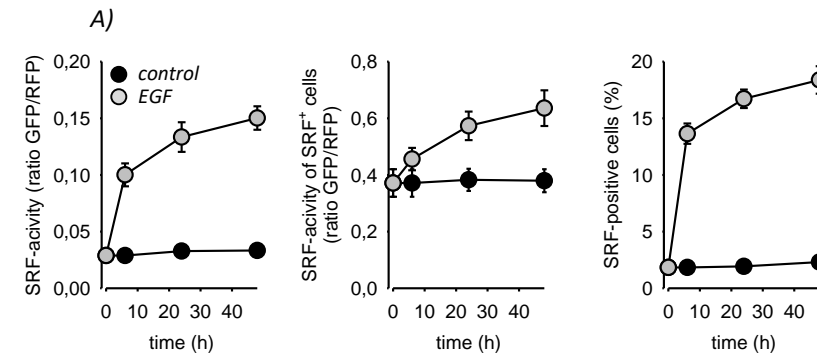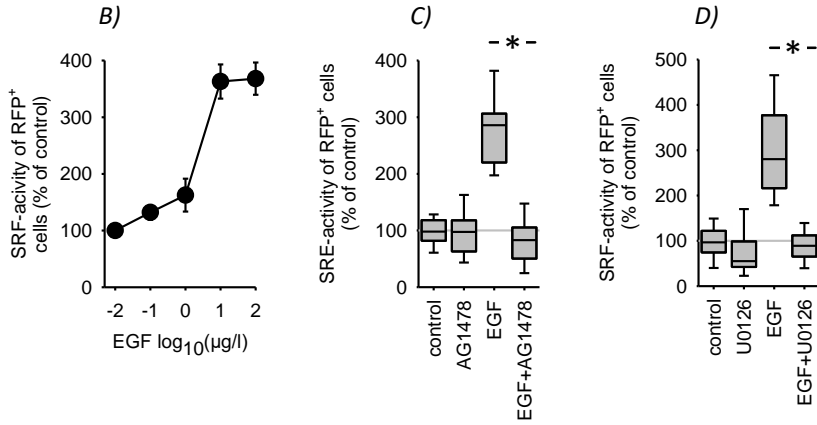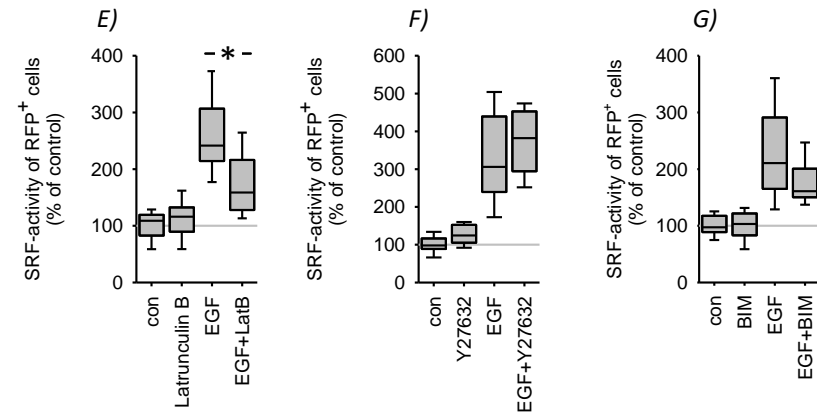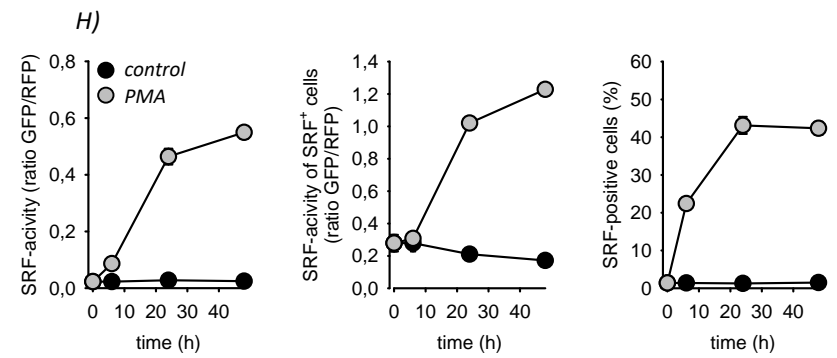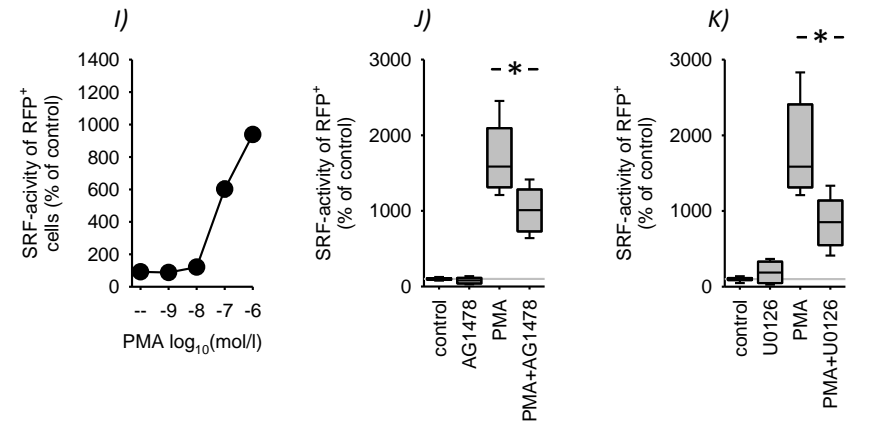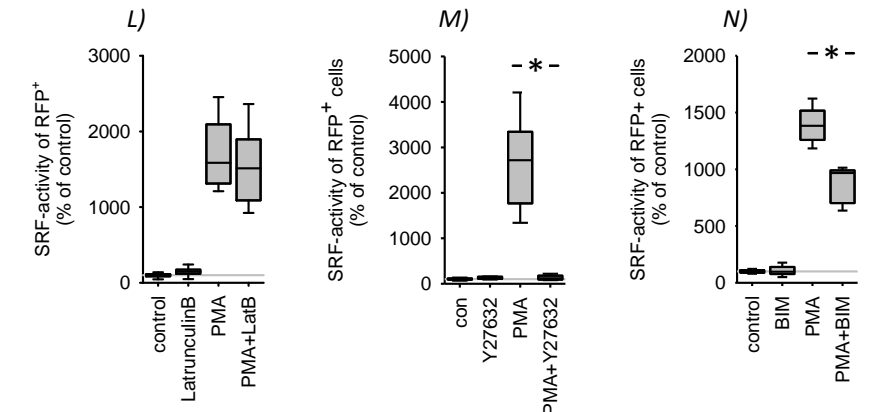

**Supplementary figure SF04.** Pharmacological identification of pathways involved in AT1R-induced SRE-activation by angiotensin II (1 nmol/l AI) in HEK293 cells transfected with AT1R. t=24h. N=24. A) Inhibition of EGFR-kinase by 100 nmol/l AG1478, B) ERK1/2-phosphorylation by 1  $\mu$ mol/l U0126, C) actin polymerization by 100 nmol/l latrunculin B (LatB), D) Rho-kinase (ROCK) activity by 10  $\mu$ mol/l Y27632 and E) protein kinase C activity by 100 nmol/l bisindolylmaleimide (BIM). \* = p<0.05.

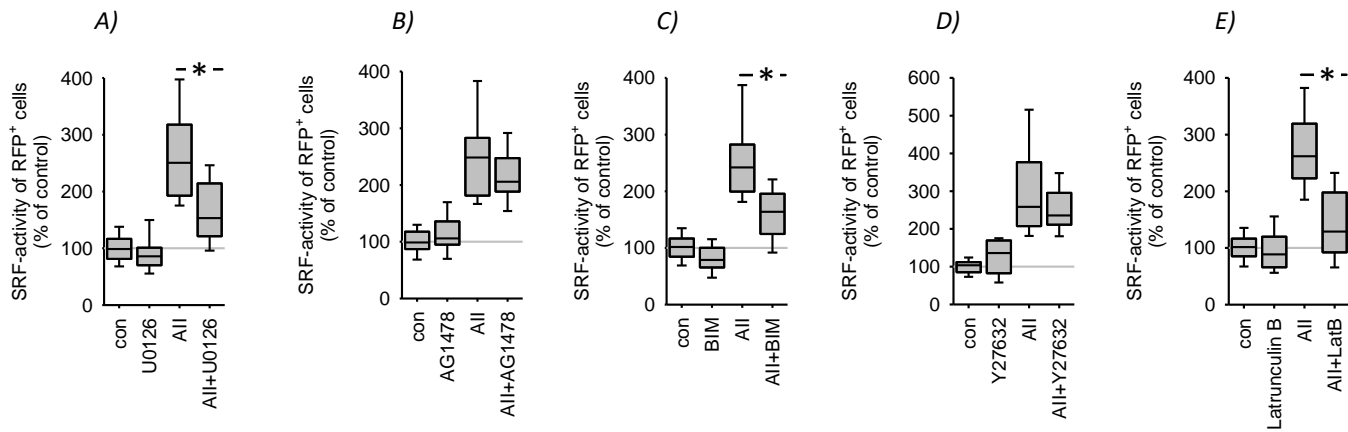

**Supplementary Figure SF05.** A) Synergistic effect on aggregate SRF-activity in HEK293 cells transfected with AT1R. B) Synergistic effect on SRF-activity of SRF-positive cells (analogous effect). C) Synergistic effect on the fraction of SRF-positive cells (digital effect). D)-F) EGFR-AT1R-synergism depends on the EGF concentration. t=6, 24, 48h. N=24. \* = p<0.05 versus control, if not indicated otherwise.

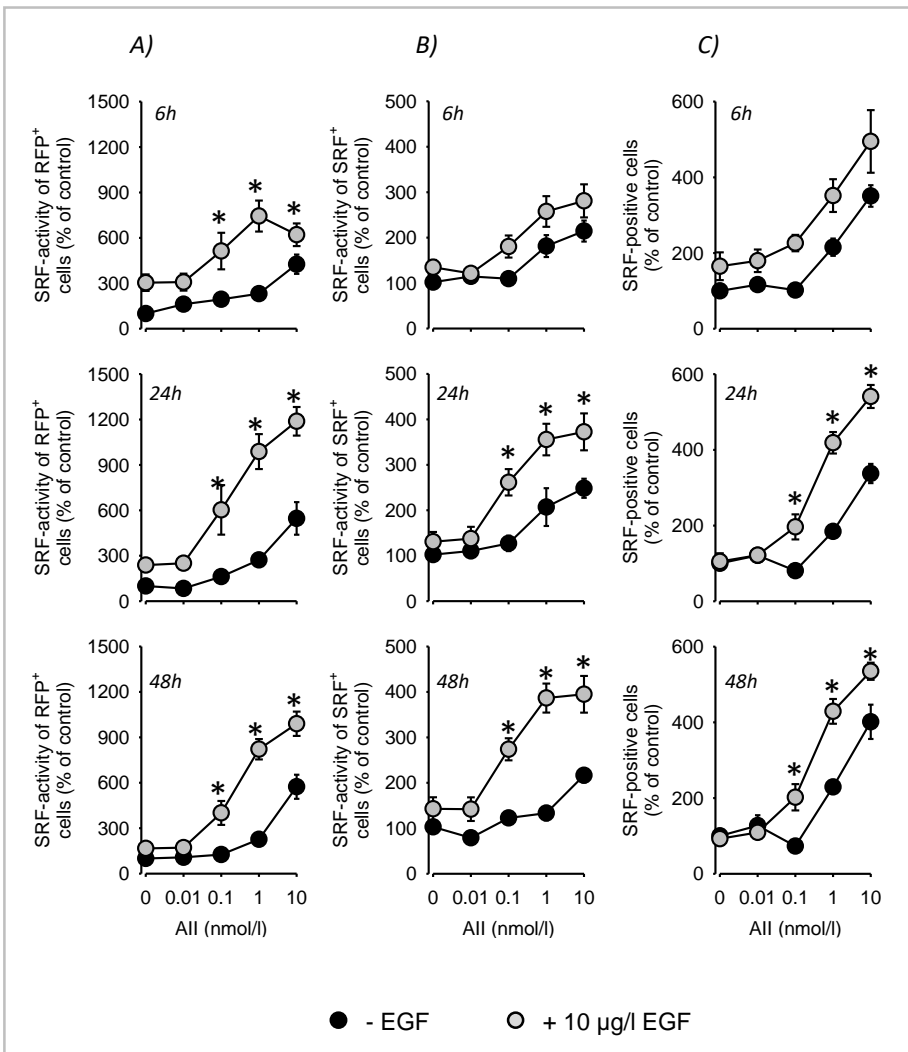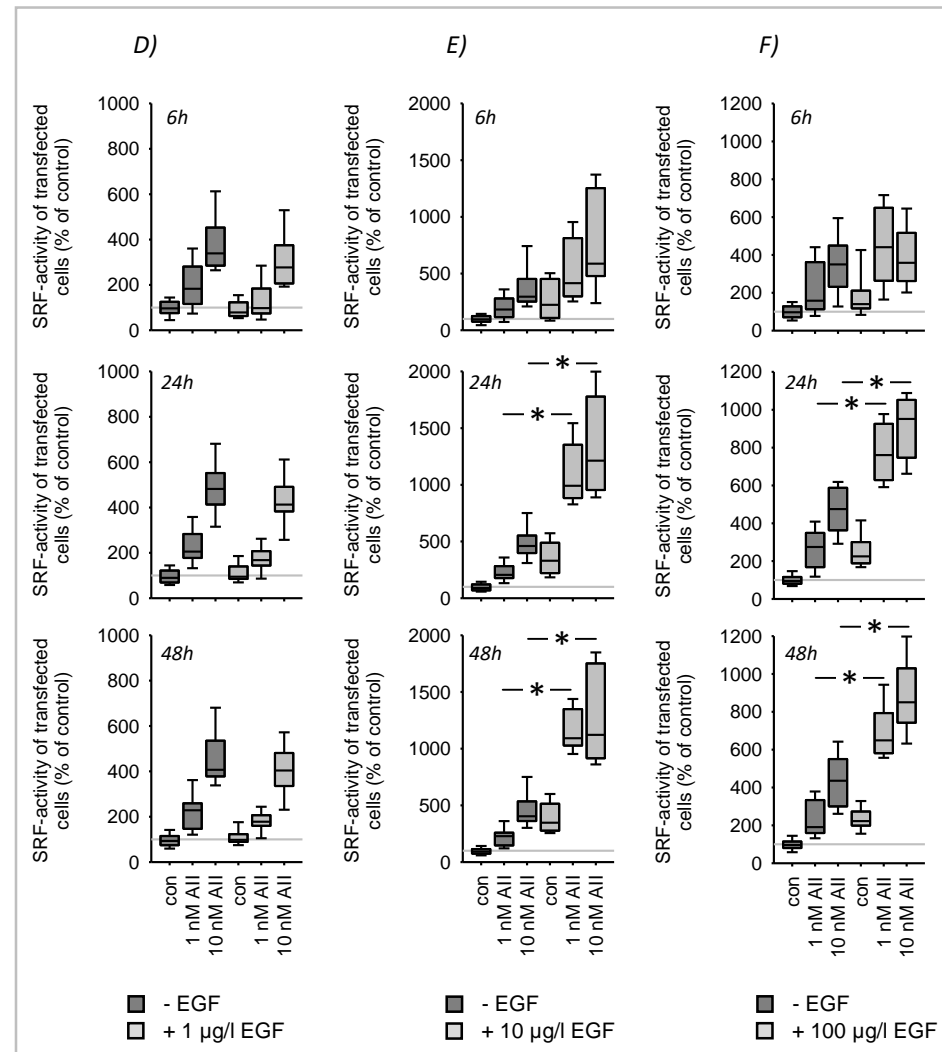

**Supplementary Figure SF06.** A) Time-course of SRF activation by angiotensin II (1 nmol/l AII) in HK-2 cells transfected with AT1R. N=24. B) Concentration-response curve of SRF activation by AII in HK-2-AT1R cells after 24h. t=24h. N=18. C-G) Pharmacological identification of pathways involved in AT1R-induced SRE-activation. t=24h. N=24. C) Inhibition of EGFR-kinase by 100 nmol/l AG1478, D) ERK1/2-phosphorylation by 1  $\mu$ mol/l U0126, E) actin polymerization by 100 nmol/l latrunculin B (LatB), F) Rho-kinase (ROCK) activity by 10  $\mu$ mol/l Y27632 and G) protein kinase C activity by 100 nmol/l bisindolylmaleimide (BIM). H) Synergistic action of 10  $\mu$ g/l EGF and AII on SRF-activity. t=6, 24 or 48h. N=18. I) The action of 1 nmol/l AII and the synergistic action of 1 nmol/l AII + 10  $\mu$ g/l EGF are prevented by the AT1R blocker losartan (L, 1  $\mu$ mol/l). t=6, 24 or 48h. N=12). J) Estimation of the maximum effect (Emax) elicited by AII in the absence and presence of EGF and of the half-maximum AII concentration (EC50) from the data in panel H. \* = p<0.05 versus control, if not indicated otherwise.

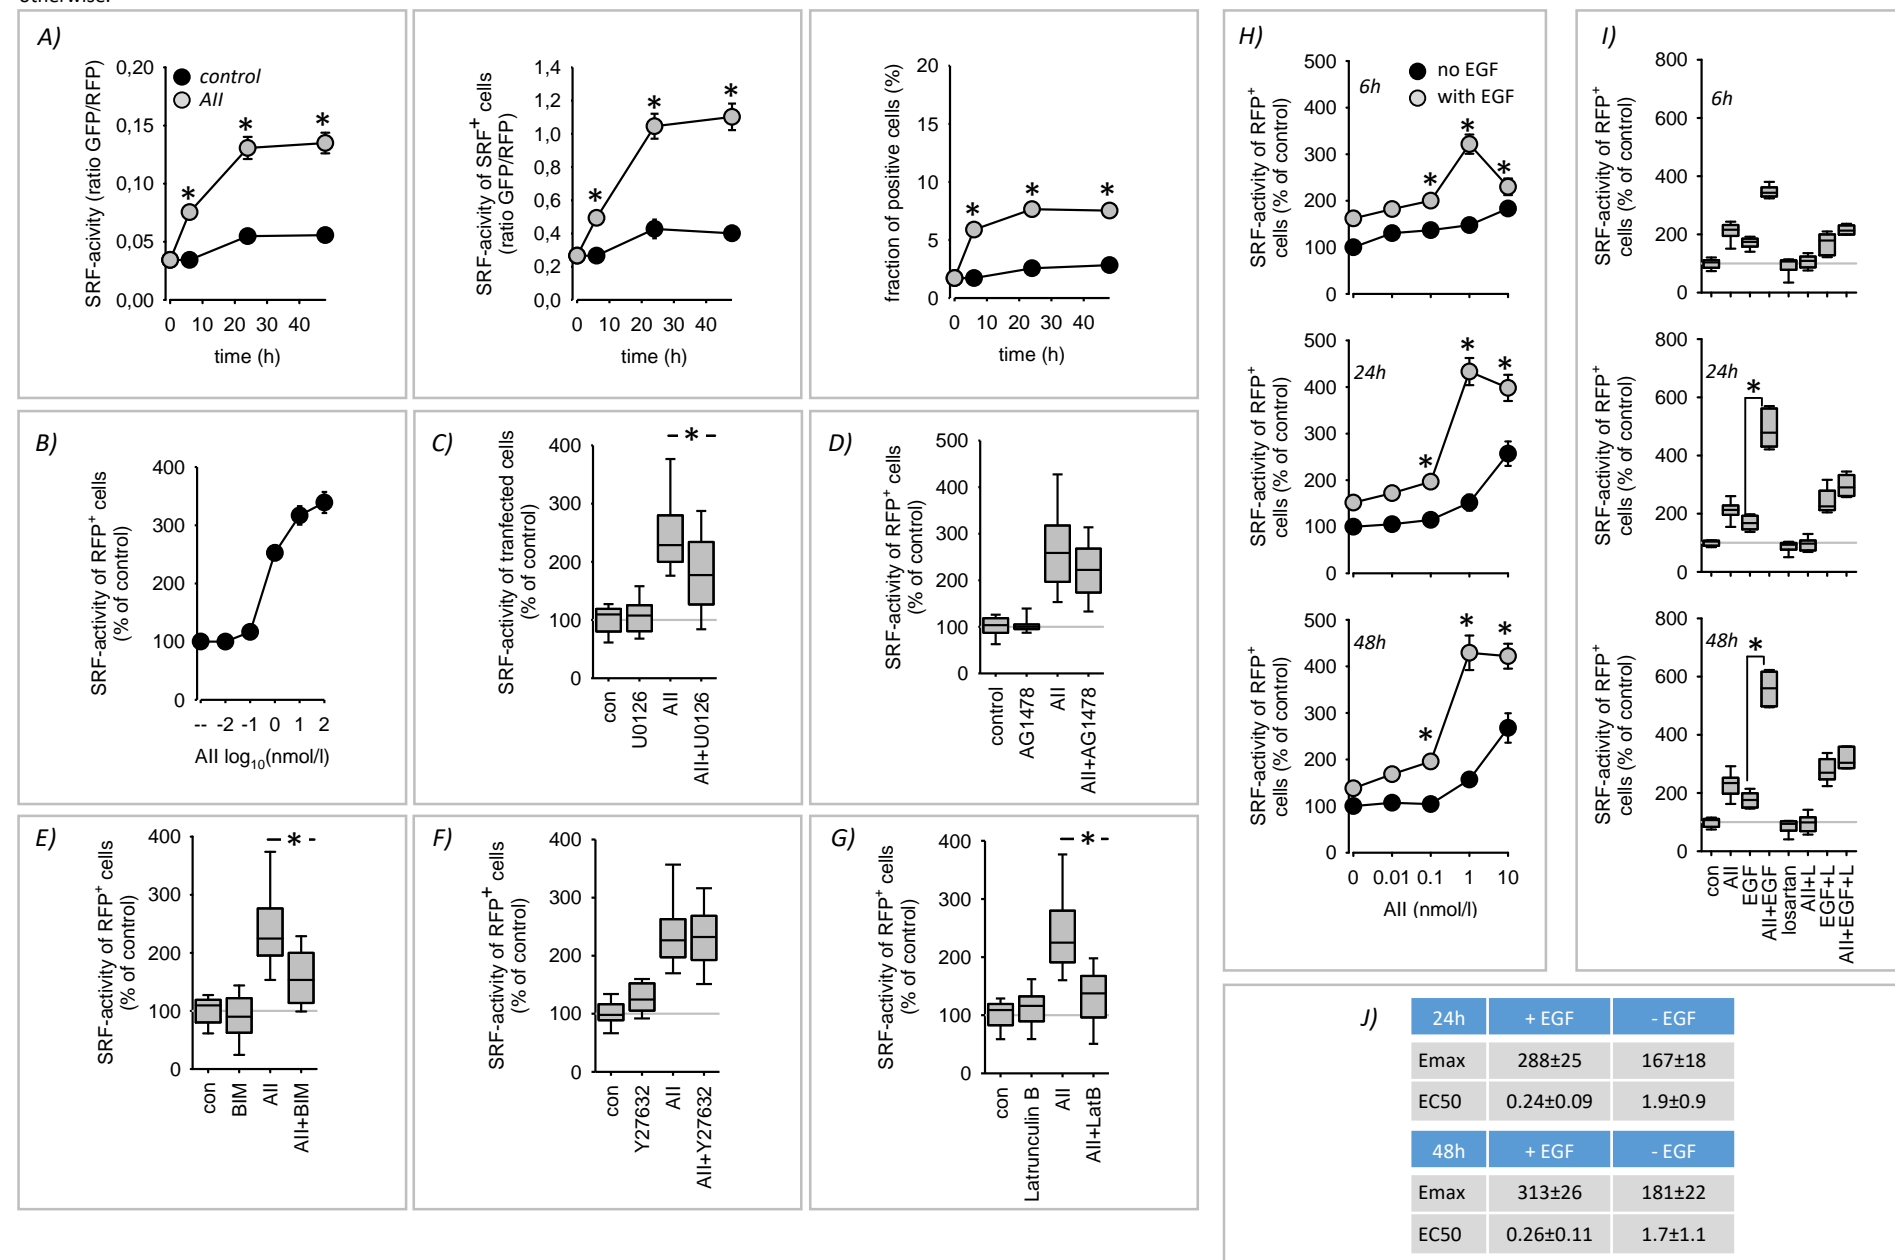



**Supplementary figure SF07.** A) Synergistic effect on aggregate SRF-activity in HK2 cells transfected with AT1R. B) Synergistic effect on SRF-activity of SRF-positive cells (analogue effect). C) Synergistic effect on the fraction of SRF-positive cells (digital effect). D)-F) EGFR-AT1R-synergism depends on the EGF concentration. t=6, 24 or 48h. N=24. \* = p<0.05 versus control, if not indicated otherwise.

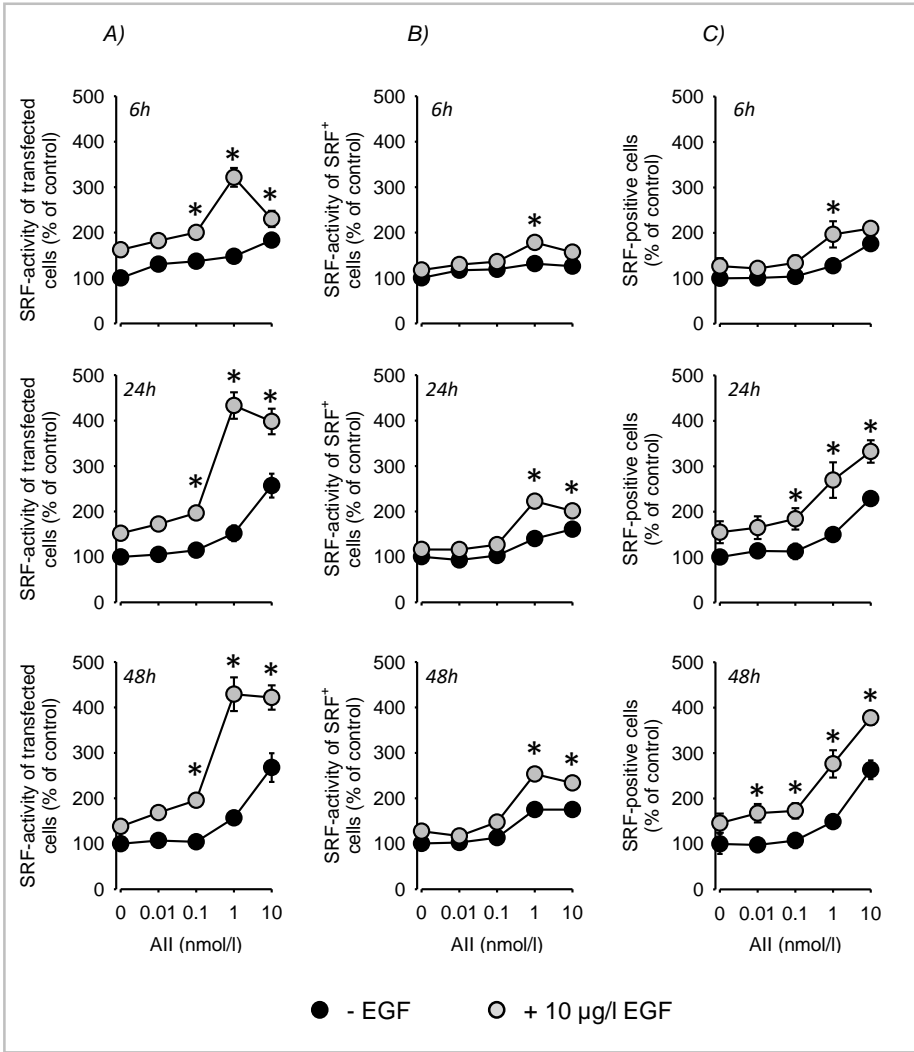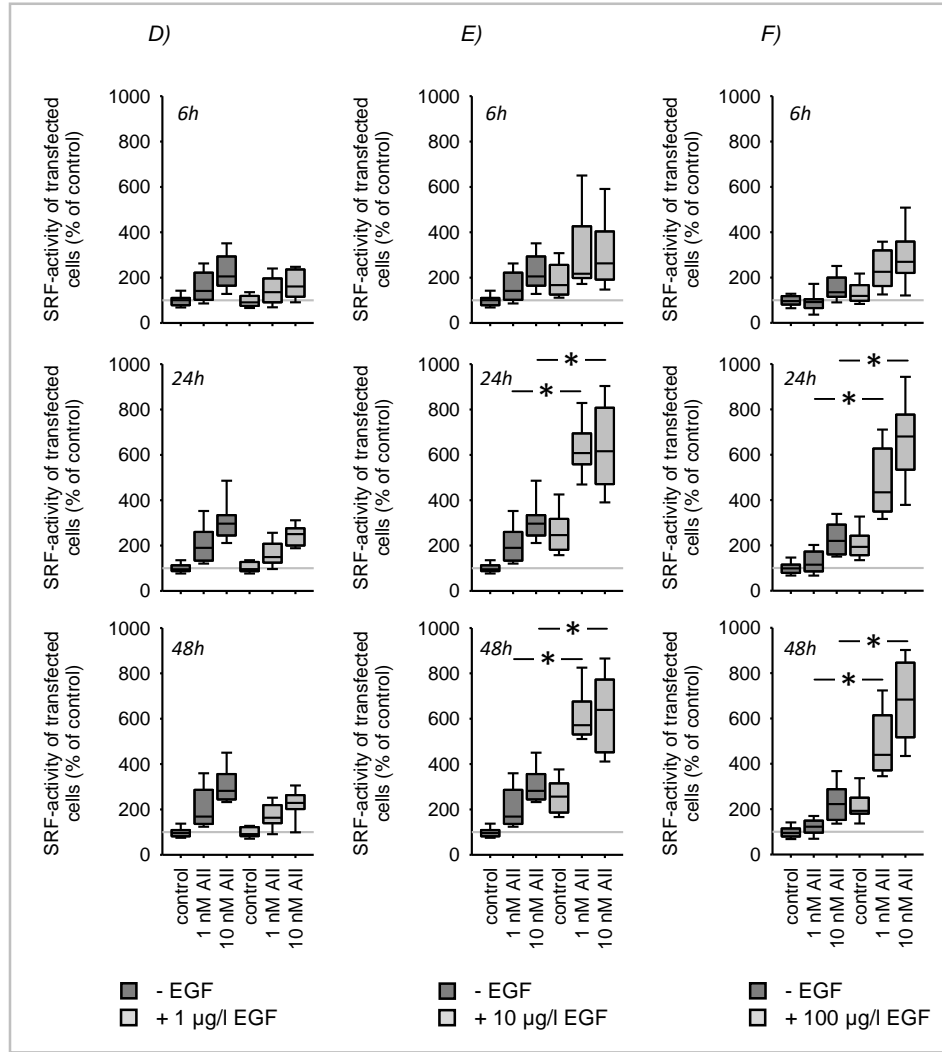

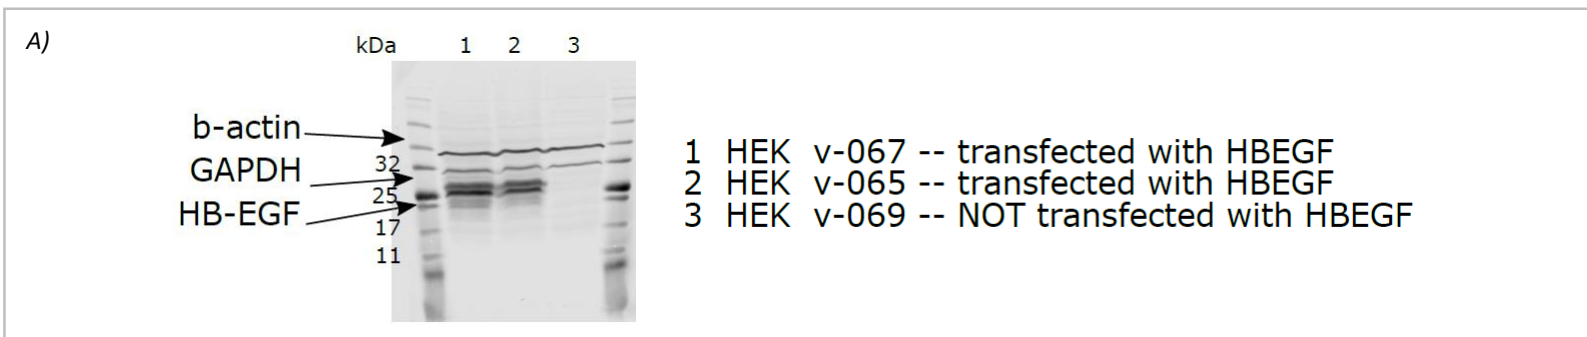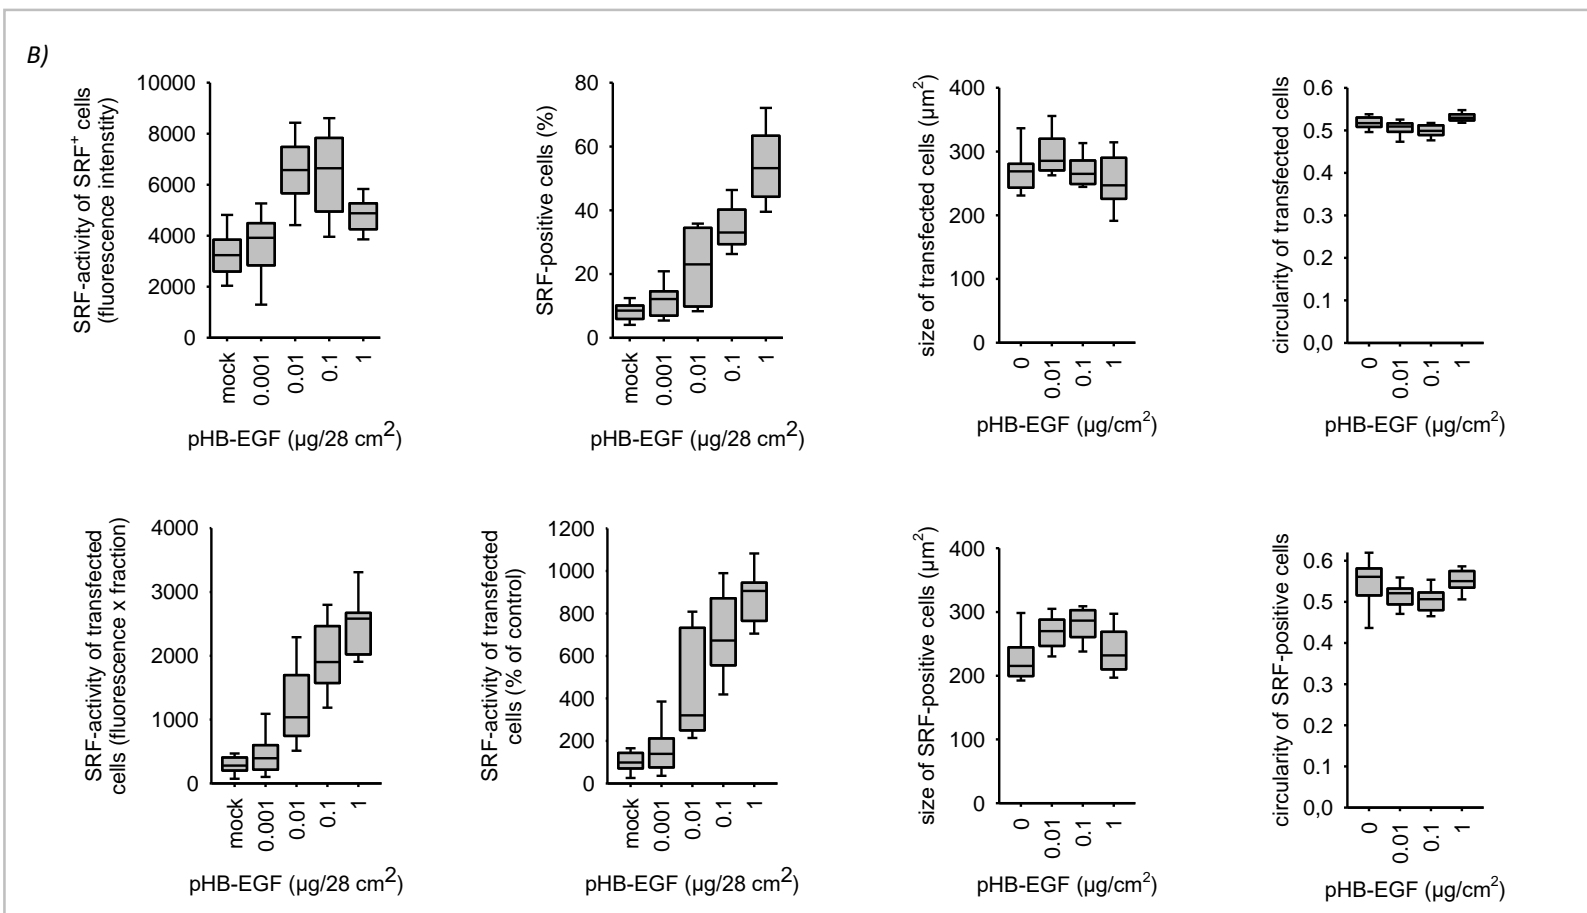

**Supplementary Figure SF09.** A) In the absence of HB-EGF AT1R-induced activation of SRF is independent of EGFR. HB-EGF expression leads to additional EGFR-mediated SRF-activation by AT1R. B) AT1R-induced activation of SRF normalized to control values in the absence of HB-EGF. HB-EGF expression leads to an increase in maximum SRF-activation and tincreases the All-sensivity (EC50 values). t=6, 24 or 48h. N=18. \* = p<0.05 versus control, if not indicated otherwise.

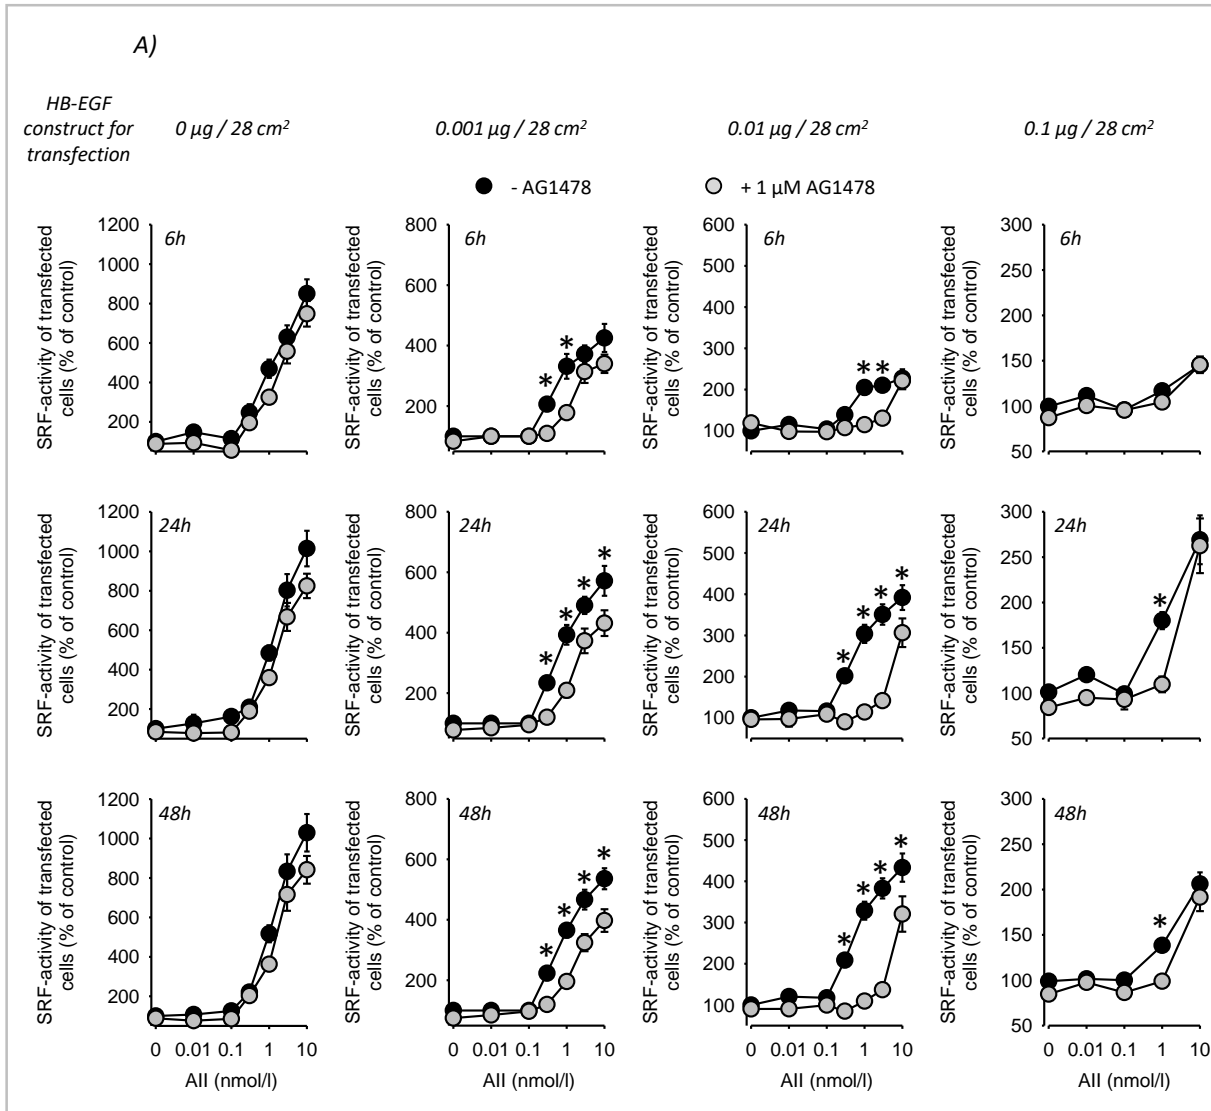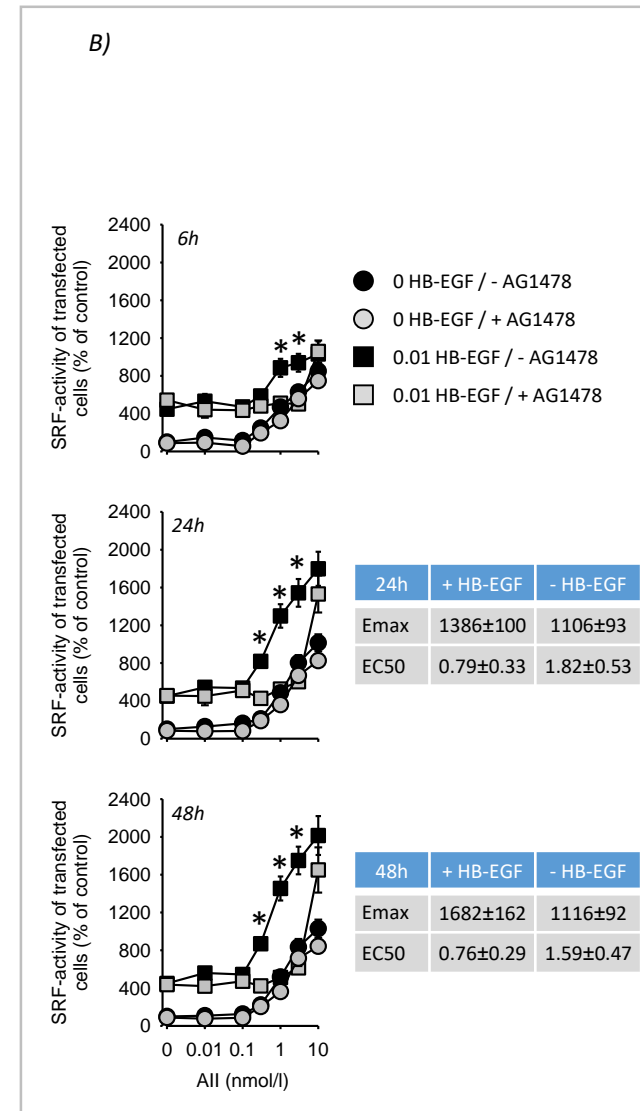

**Supplementary Figure SF10.** Coculture of reporter cells (transfected with SRE-GFP) with HB-EGF-transfected „donor“ cells shows that paracrine HB-EGF signalling also leads to a synergistic effect of AT1R and EGFR with respect to SRF activation. A) HB-EGF expressing donor cells without AT1R induce no All-sensitivity in reporter cells. B) Donor cells with HB-EGF and AT1R induce a moderate All-sensitivity of reporter cells mediated by EGFR activation. C) Additional expression of AT1R in reporter cells leads to synergistic (EGFR-dependent) SRF activation. D) When AT1R is expressed in reporter but not in donor cells, the effect of All is EGFR-independent. E) This effect is similar to the reaction of reporter cells in monoculture. 1  $\mu$ mol/l AG1478; 0.1, 1 or 10 nmol/l All. t=6, 24 or 48h. N=18. \* = p<0.05 versus control, if not indicated otherwise.

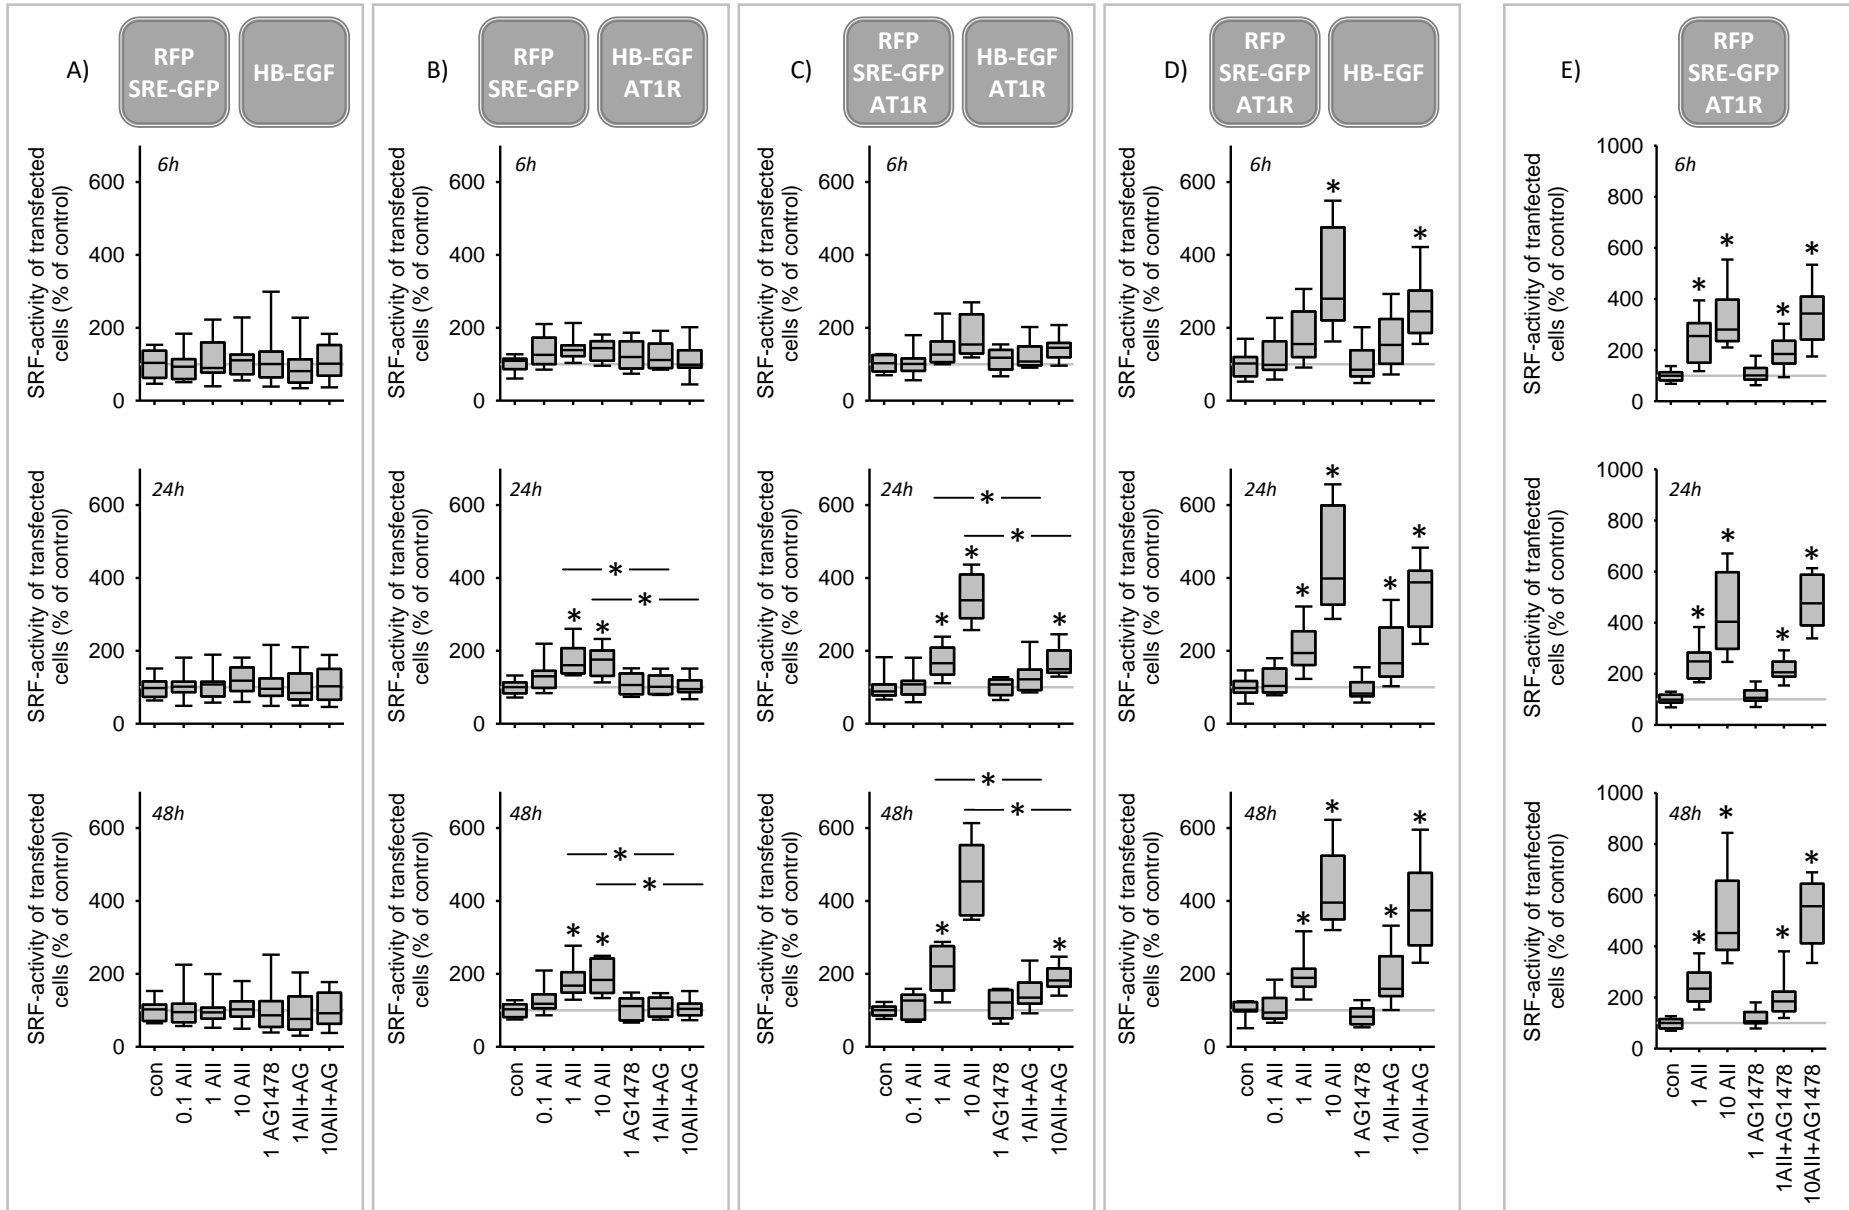

Supplementary Figure SF10. F) Control SRF-activity and fraction of SRF-positive cells under control conditions for the different coculture scenarios. N=12. \* = p<0.05 versus con & AT1R-HB-EGF.

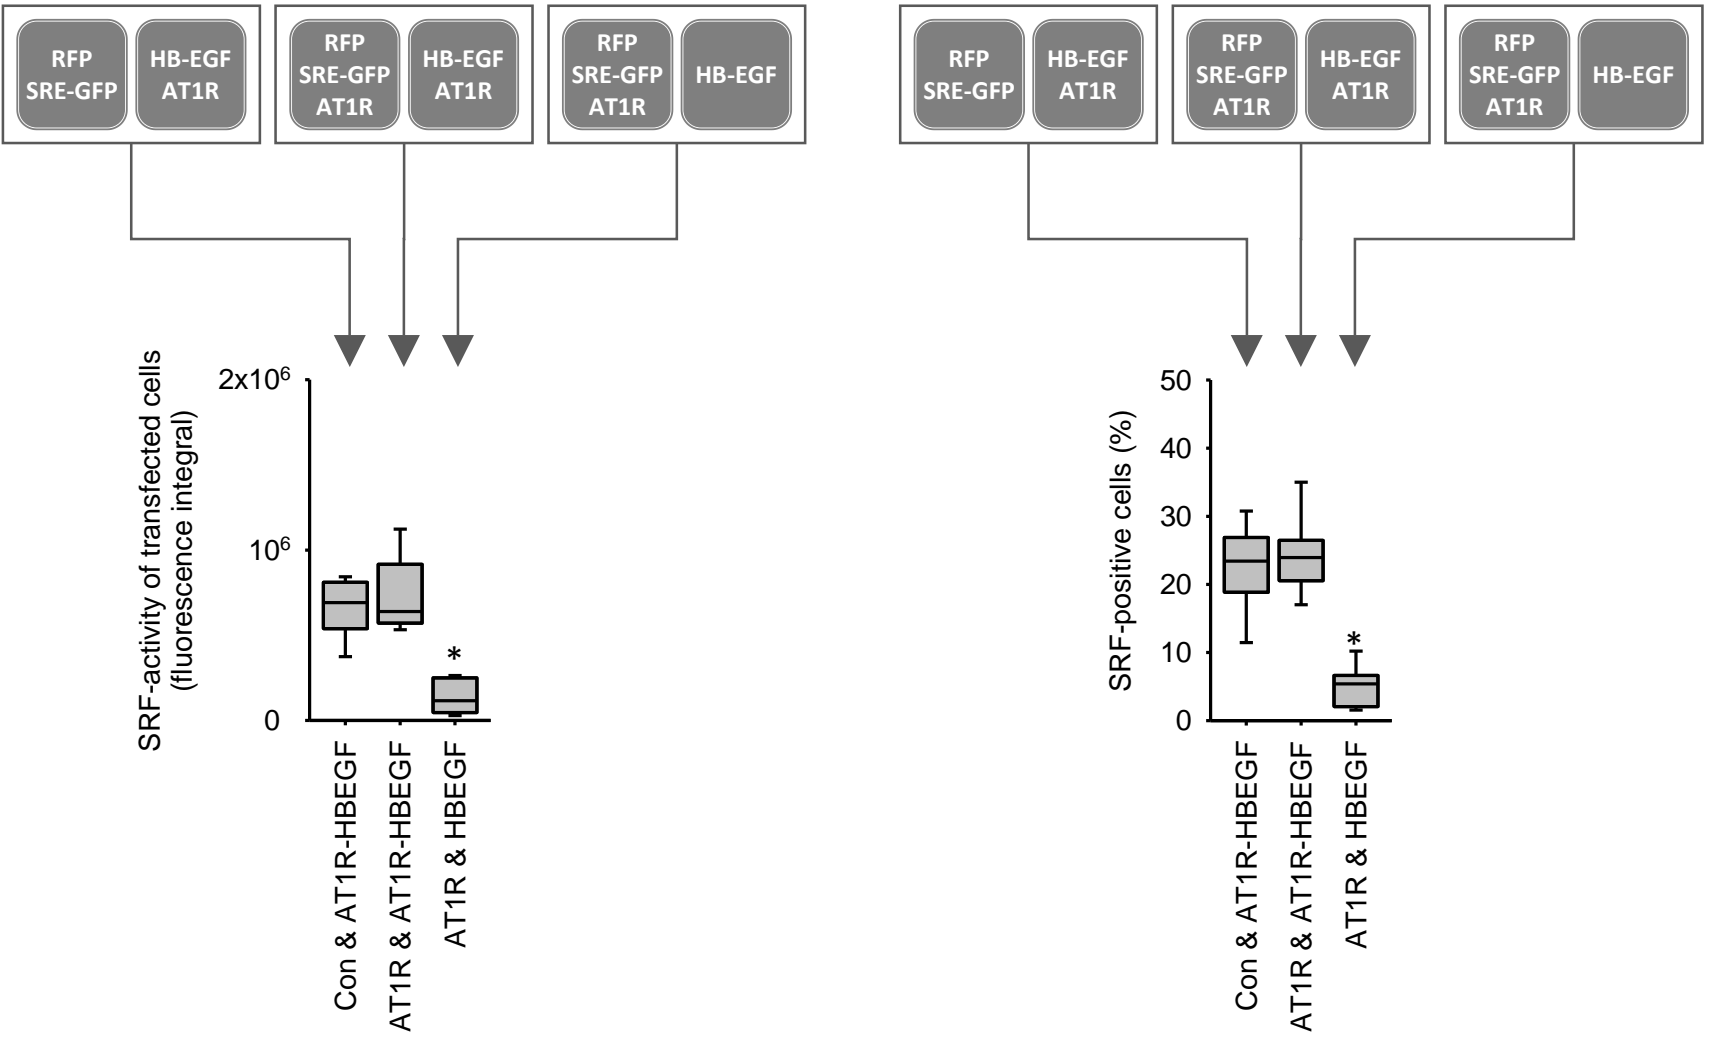

**Supplementary Figure SF11.** A) The synergism of All and EGF is also observed in vascular smooth muscle cells (A7r5 cell line). N=24. B) representative photomicrographs of A7r5 cells (red = transfected cells, green = cells with active SRF). N=24. C) Inhibition of SRF activation by EGFR-inhibition (100 nmol/l AG1478). t=6, 24 or 48h. N=12. \* = p<0.05.

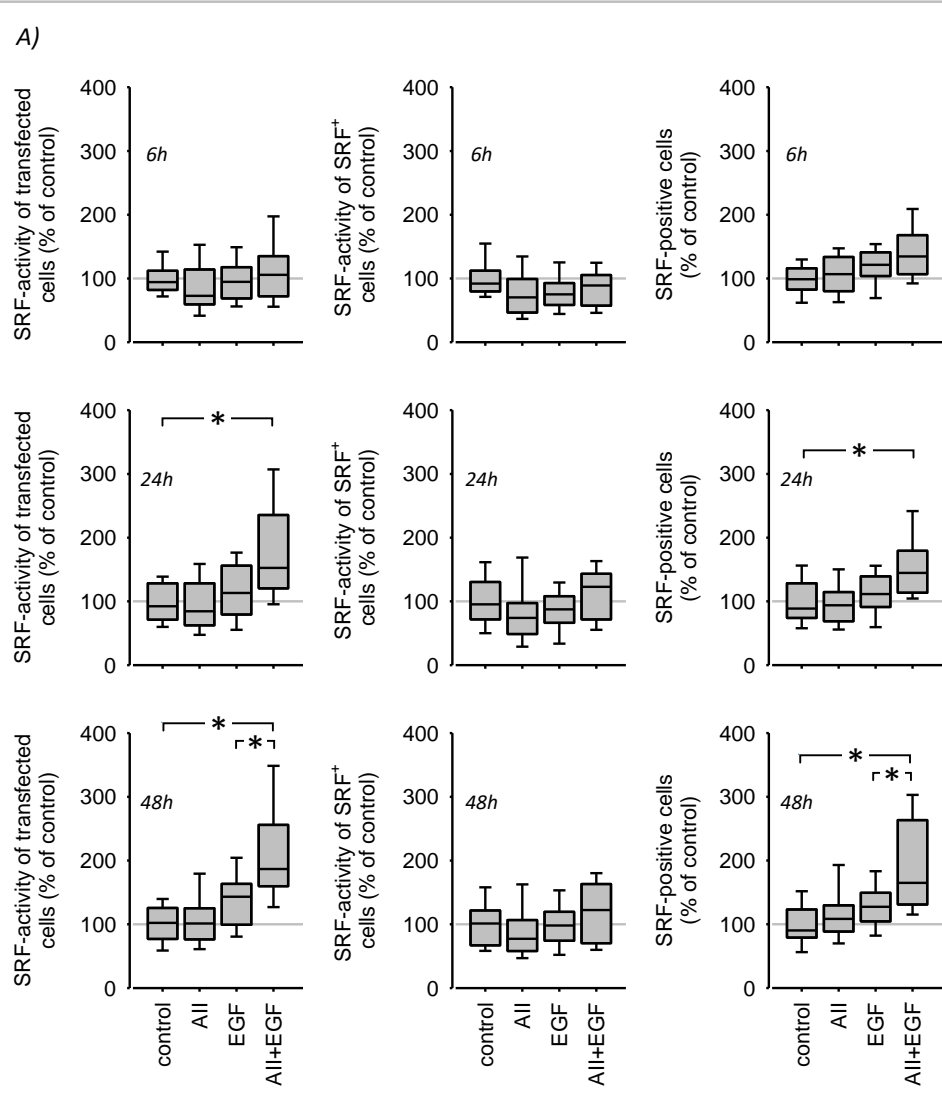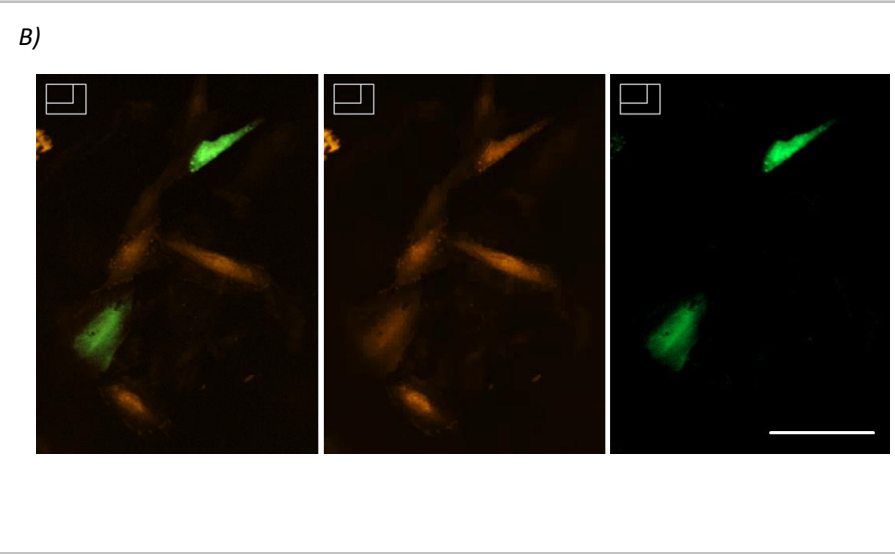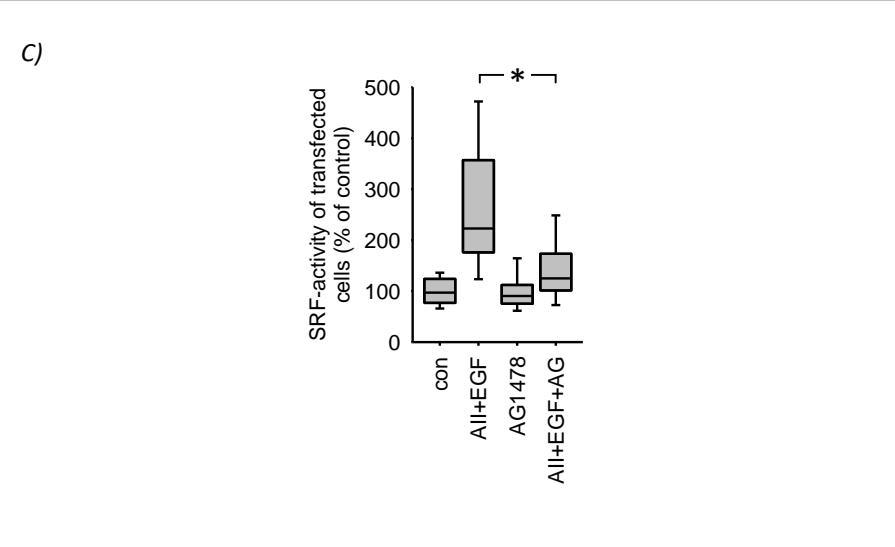

**Supplementary Figure SF12.** Pharmacology of ATR1-EGFR synergism with respect to SRF activation in HK-2 cells after 6, 24 or 48h. A) Pharmacological screening of putative involved pathway. Inhibition of EGFR-kinase by 100 nmol/l AG1478, inhibition of ERK1/2-phosphorylation by 1  $\mu$ mol/l U0126, inhibition of cSRC kinase family by 10  $\mu$ mol/l PP2, inhibition of p38 kinase activity by 1  $\mu$ mol/l SB203580, inhibition of PI3-kinase activity by 1  $\mu$ mol/l Ly294002, Ca<sup>2+</sup>-chelation by 50  $\mu$ M BAPTA-AM, Rho inhibition with 1  $\mu$ mol/l Rhosin or 1  $\mu$ g/ml Rho Inhibitor 1 (Rho1, cell permeable C3 transferase), inhibition of Rho-kinase (ROCK) activity by 10  $\mu$ mol/l Y27632 and inhibition of protein kinase C family by 100 nmol/l bisindolylmaleimide (BIM). N=18. \* = p<0.05 versus All+EGF. B) Additive inhibitory effects of 100 nmol/l AG1478, 1  $\mu$ mol/l U0126 and 1 or 10  $\mu$ mol/l PP2. N=18. \* = p<0.05 versus All+EGF. C) Inhibition of actin polymerization by 100 nmol/l latrunculin B (LatB). N=12.

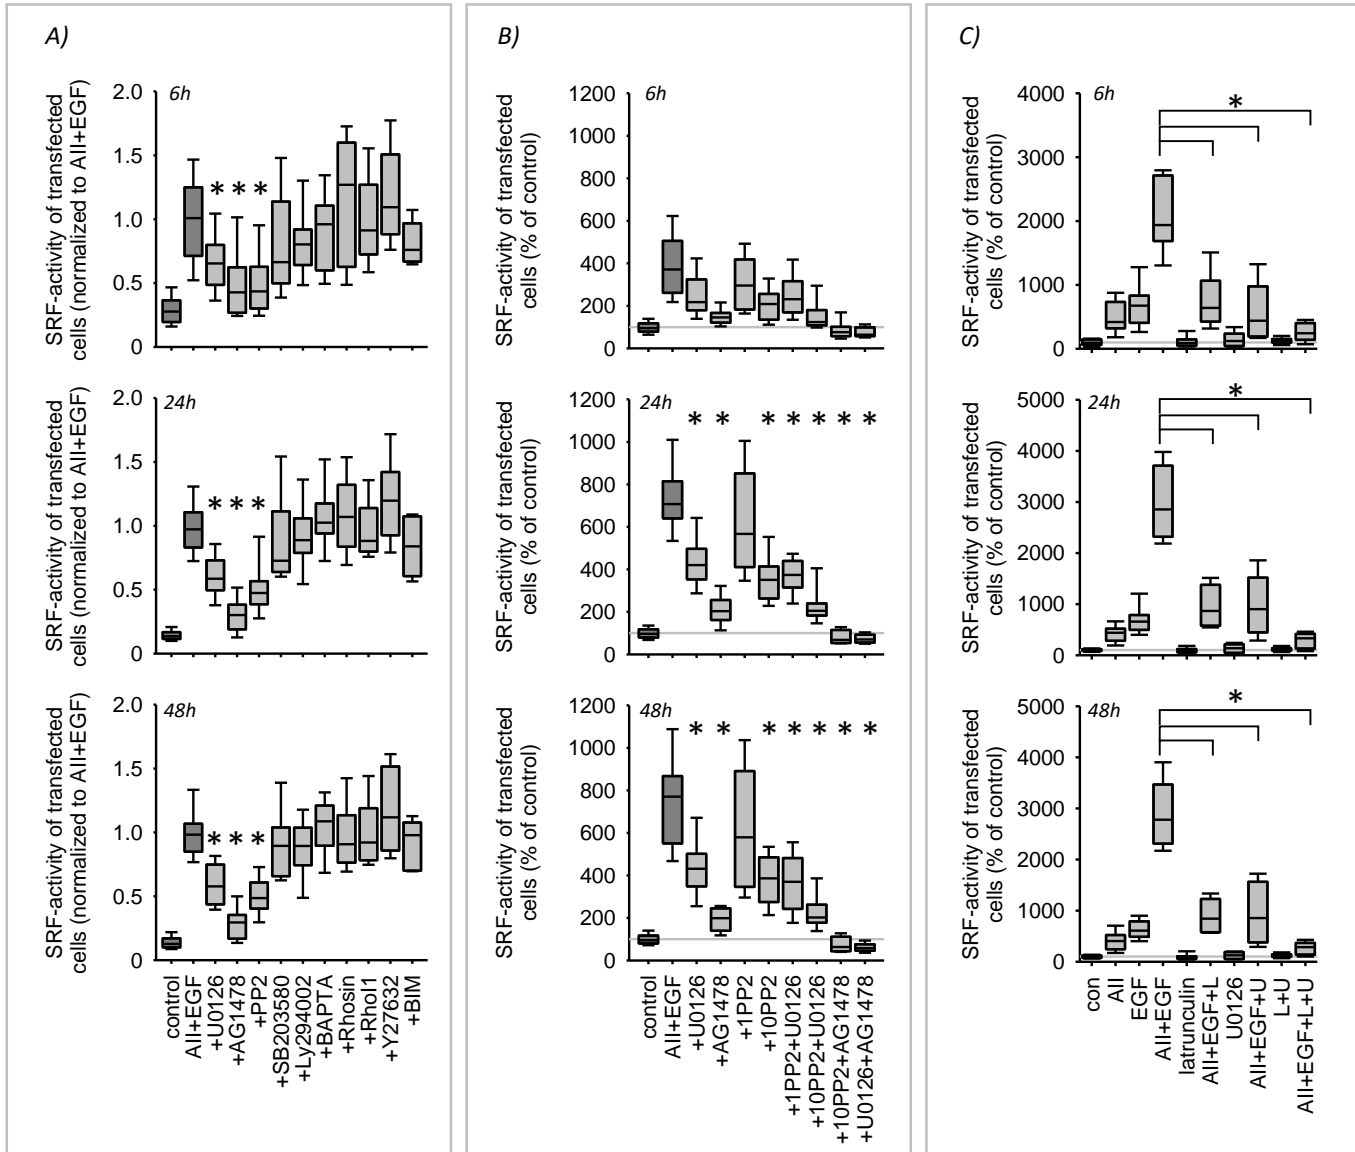

**Supplementary figure SF13.** A-F) Effect of EGF, All or All+EGF on initial EGFR-trafficking in HEK-cells. 300 cells from 3 different passages were measured. G-H) Protein-protein-interaction of AT1R with EGFR determined after 60 minutes by proximity labeling in HEK cells. G) Quantitative evaluation of AT1R-EGFR-interaction. H) Immunoblot examples. 1 nmol/l All, 10  $\mu$ g/l EGF. N=12-16. \* = p<0.05.

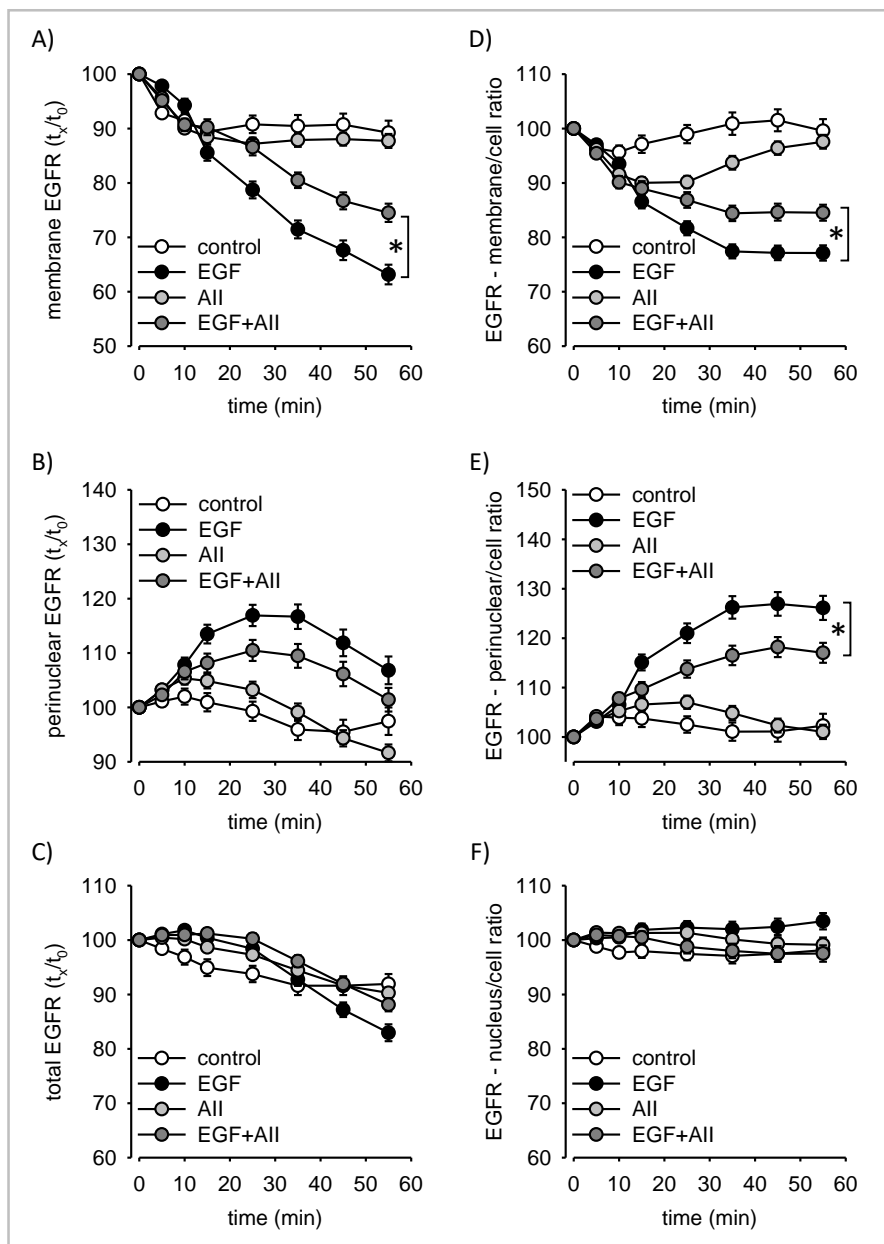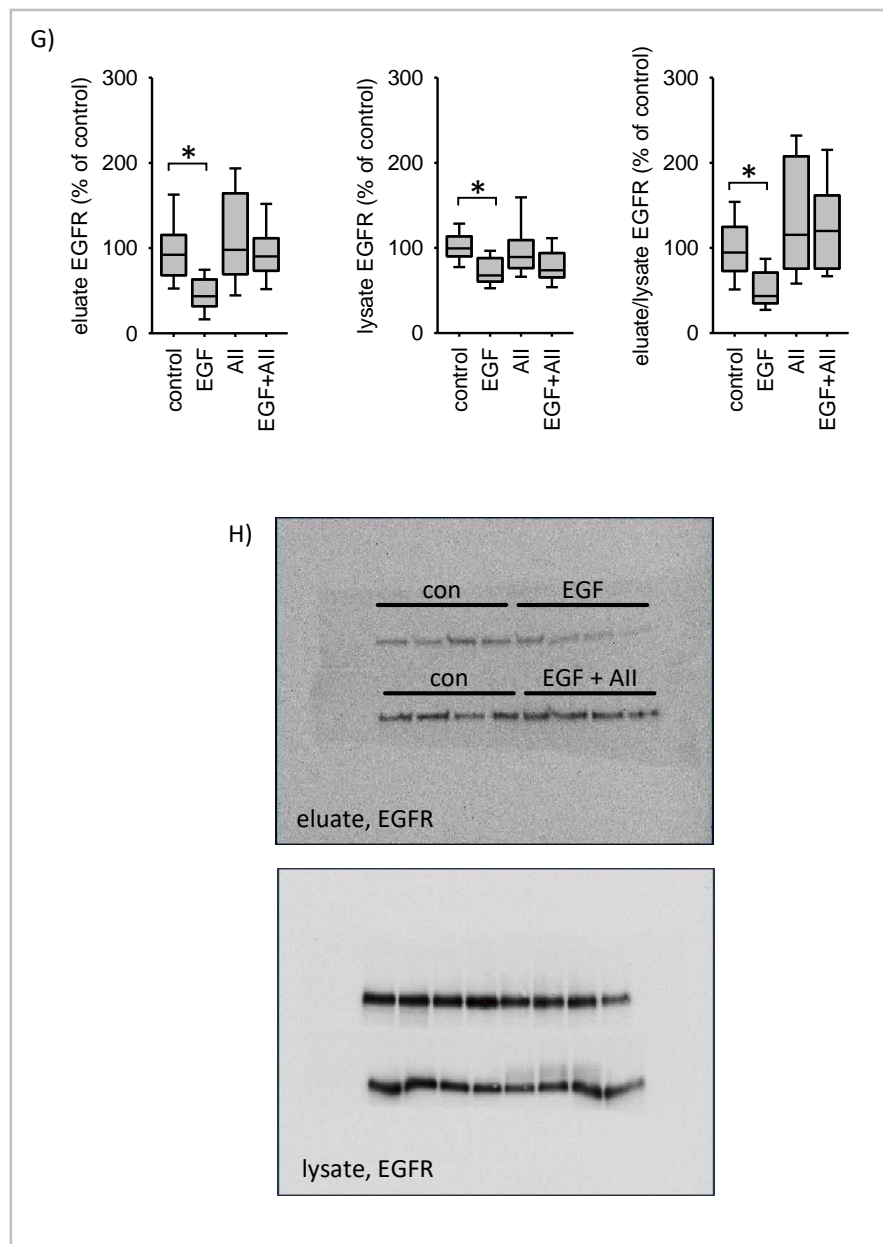



**Supplementary figure SF14.** Characterization of the two HEK-cell B6 and D5 clones stably expressing AT1R. A) Identification of the two clone stably expressing functional AT1R by SRE reporter assay. t=24h. N=18. \* = p<0.05 versus control. B) Synergistic action of AII and EGF on SRF-activity in both cell clones. t=24h. N=12. \* = p<0.05. C) ERK1/2-phosphorylation in HEK-AT1R-B6 cells. N=3. D) ERK1/2-phosphorylation in HEK-AT1R-D5 cells. N=3. E) EGFR<sup>Y1068</sup>-phosphorylation in HEK-AT1R-B6 cells. N=3. F) EGFR<sup>Y1068</sup>-phosphorylation in HEK-AT1R-B6 cells. N=3. t=30min.

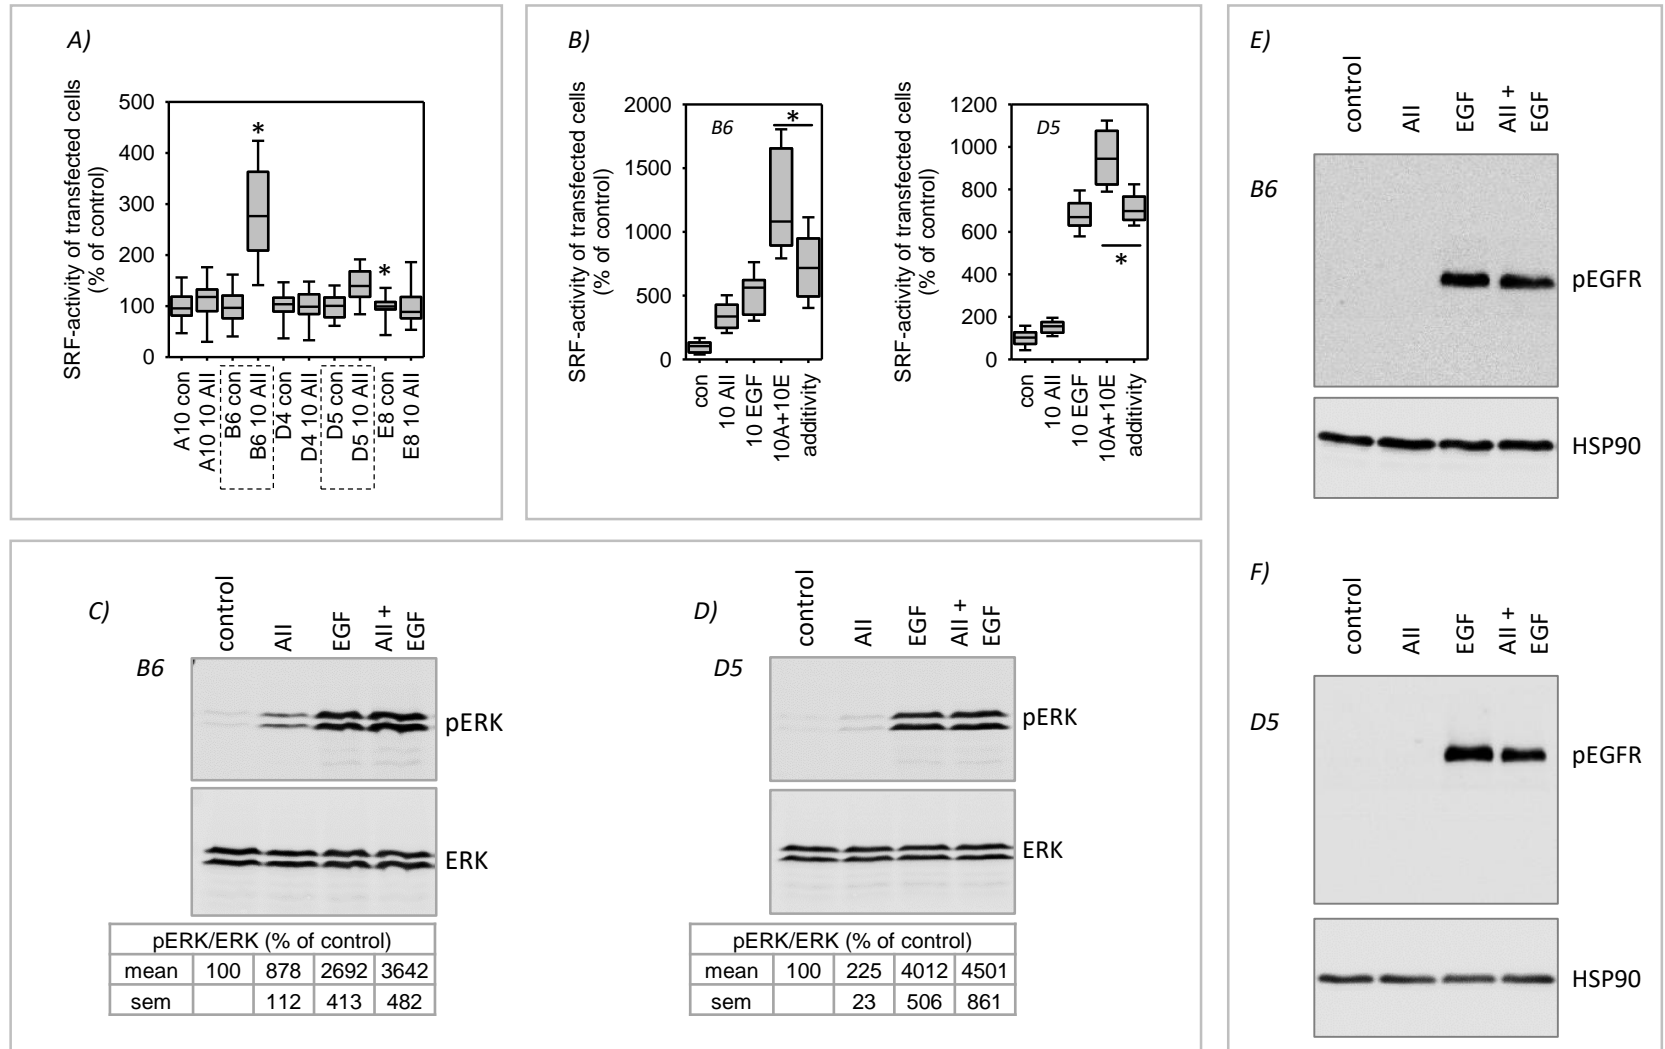

**Supplementary Figure SF15.** Effect of EGF, AII or AII+EGF on the transcriptome in HEK-AT1R-B6 cells, stably transfected with AT1R. Incubation period = 6h and 24h. N=5 for each condition. A) Number of up- or downregulated RNAs applying the mentioned thresholds. B) RNA-Seq results (fragments per million, FPM) for SRF-induced genes ARC (activity-regulated cytoskeleton-associated protein), EGR1, EGR2, EGR3 (Early growth response protein 1, 2 and 3) and cFOS. t=6h. N=5.

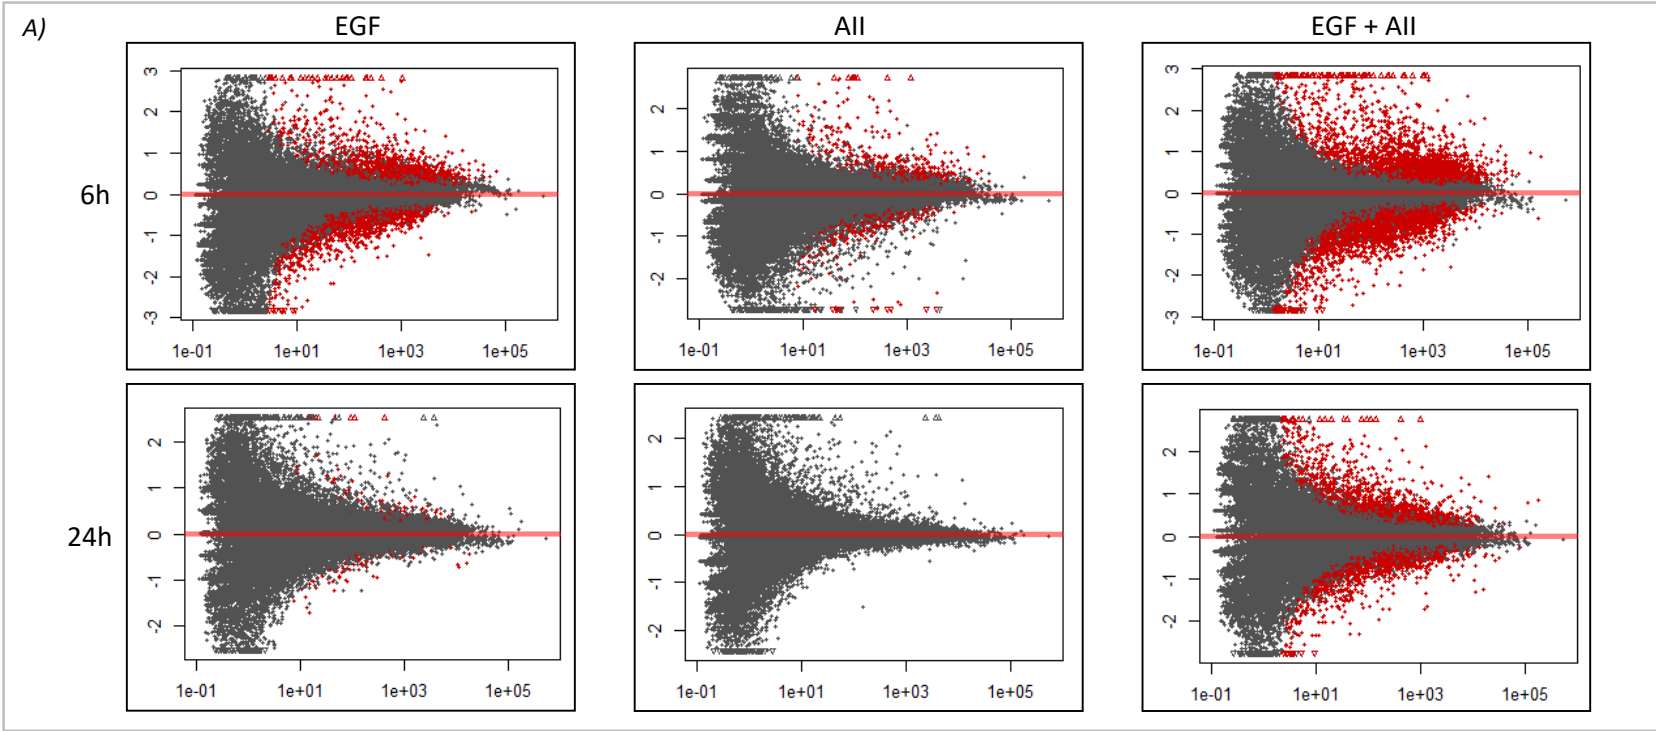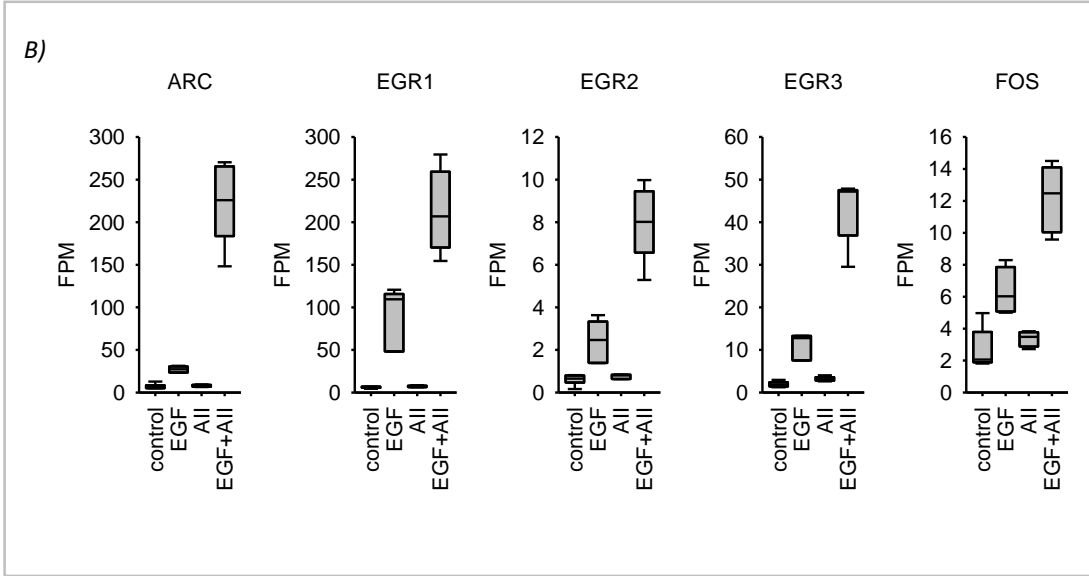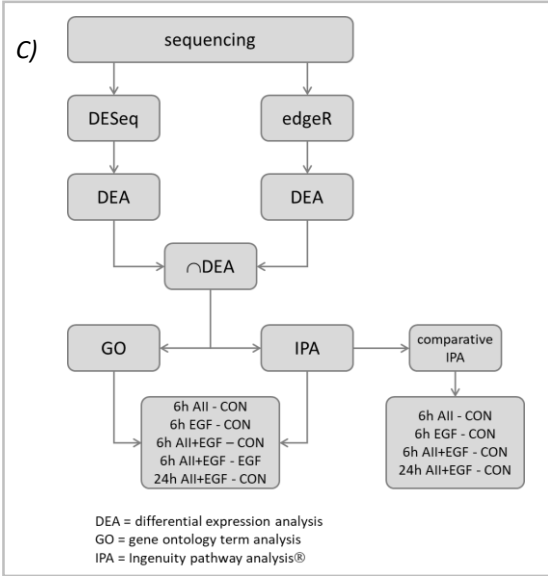

**Supplementary Figure SF15. D)** Heatmaps showing hierarchical clustering of gene significantly affected by coexposure to EGF and AII after 6h (left panel) or 24h (right panel). Clustering was performed with <https://software.broadinstitute.org/morpheus/> using „Euclidian“ metric and „Average“ linkage method.

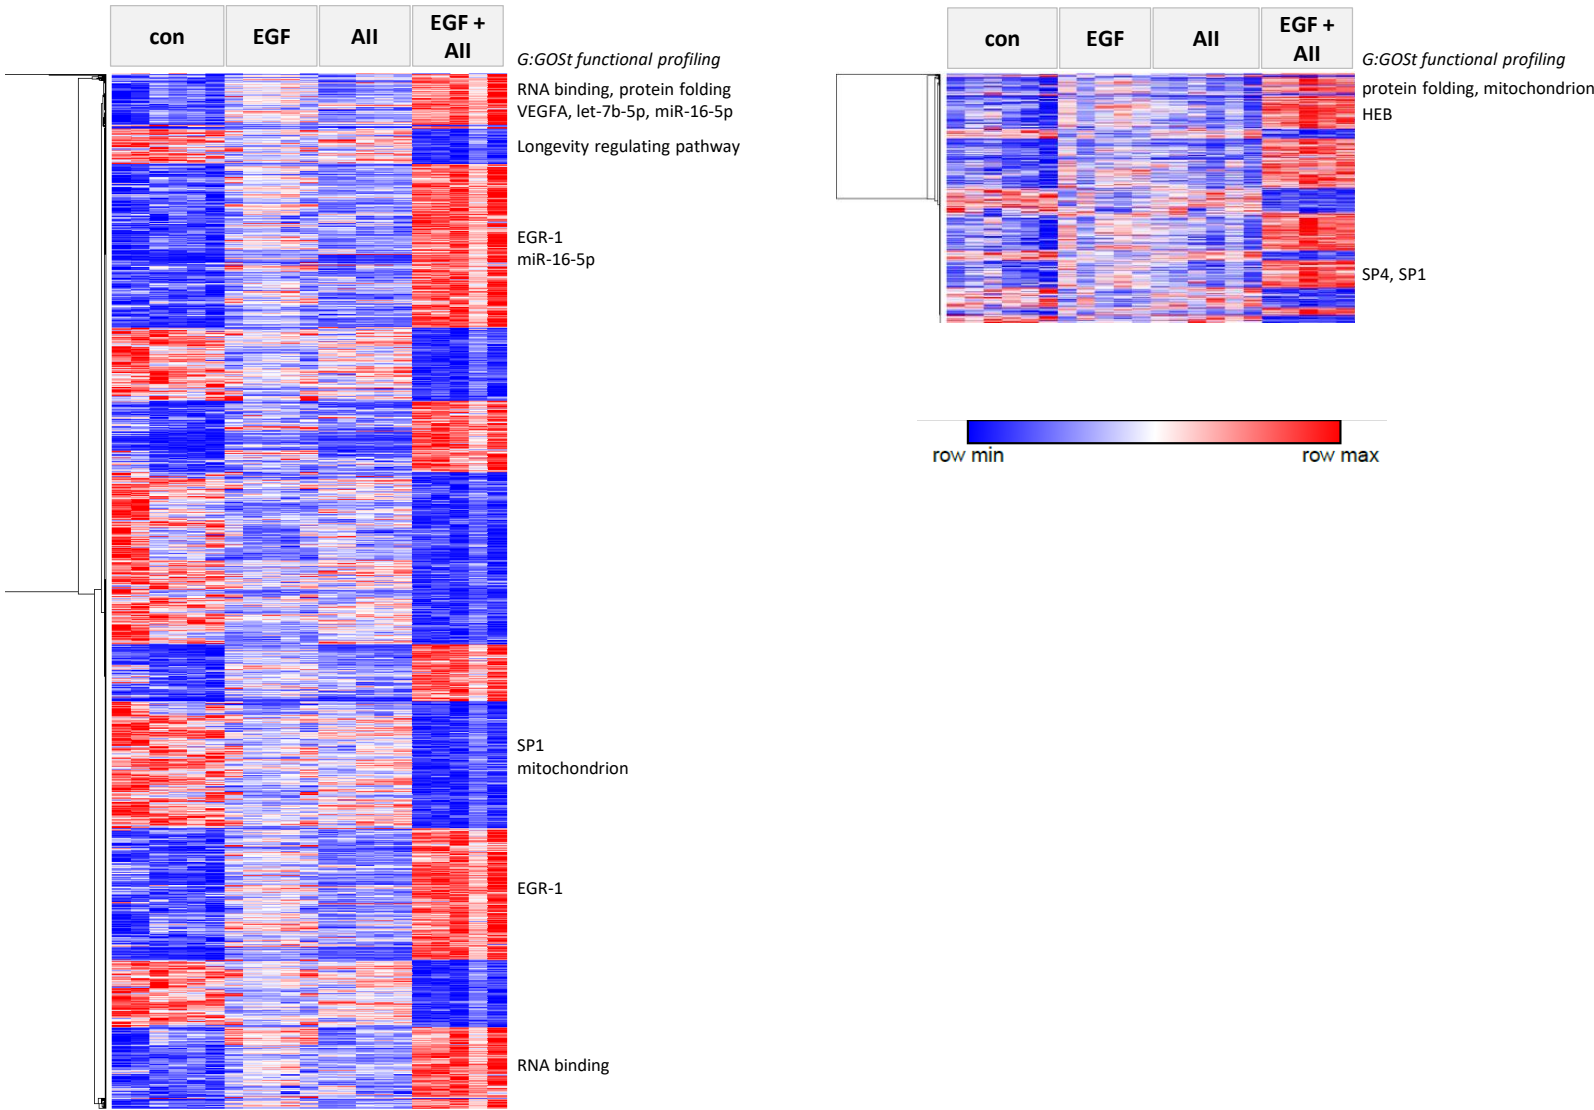

**Supplementary Figure SF16.** Correlation of gene expression regulation by 10  $\mu\text{g/l}$  EGF or 1 nmol/l with simultaneous AII + EGF incubation after 6h (A) and 24h (B) in HEK-AT1R-B6 cells, stably transfected with AT1R. N=5 for each condition.

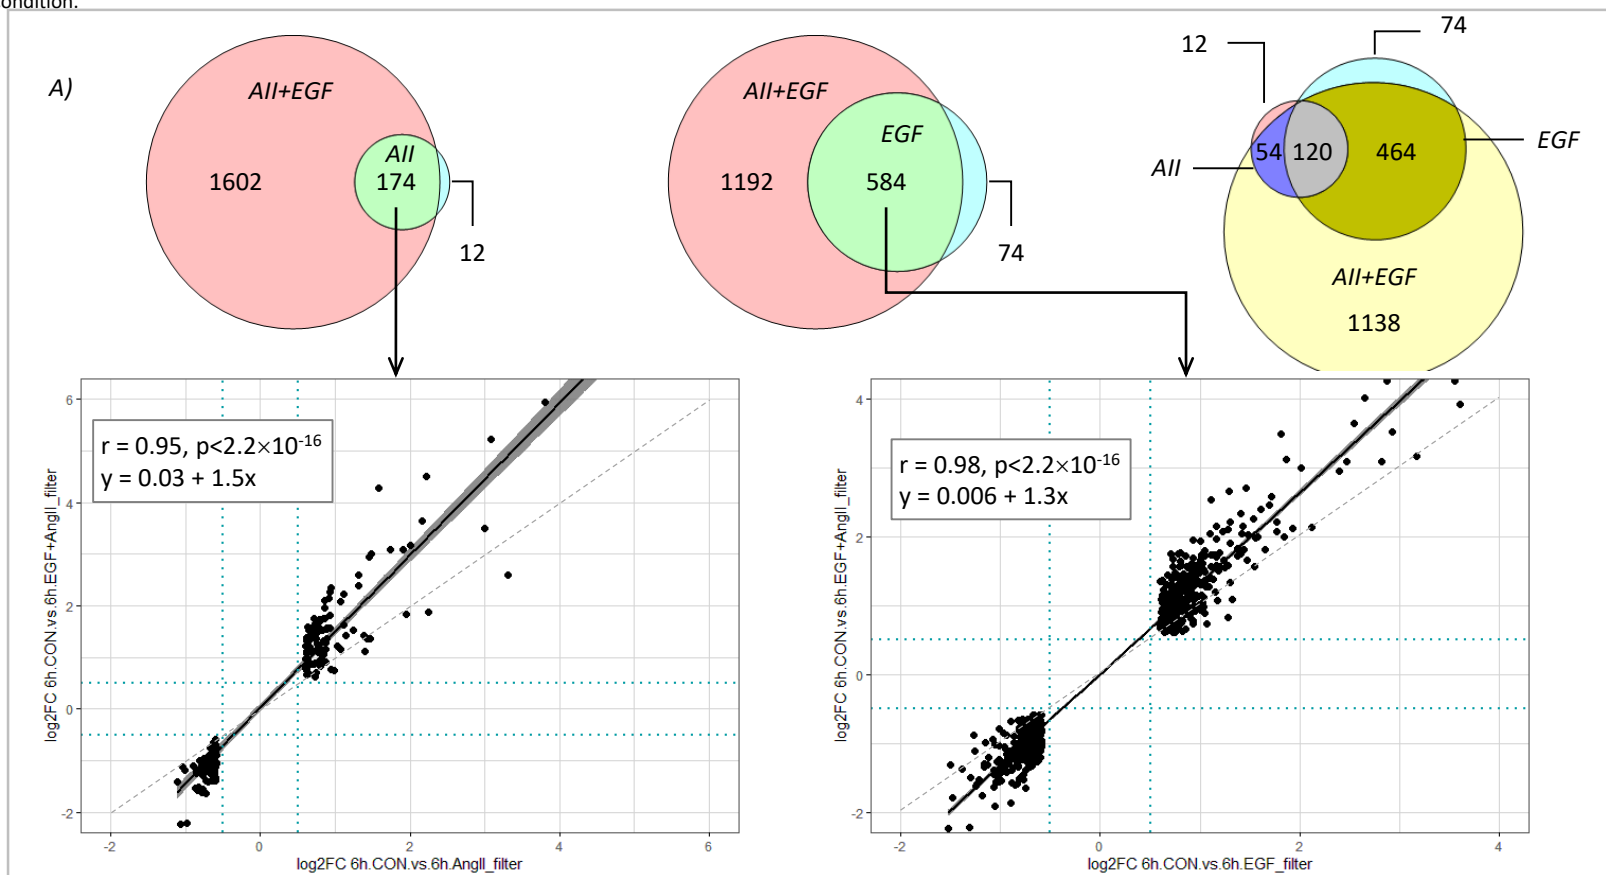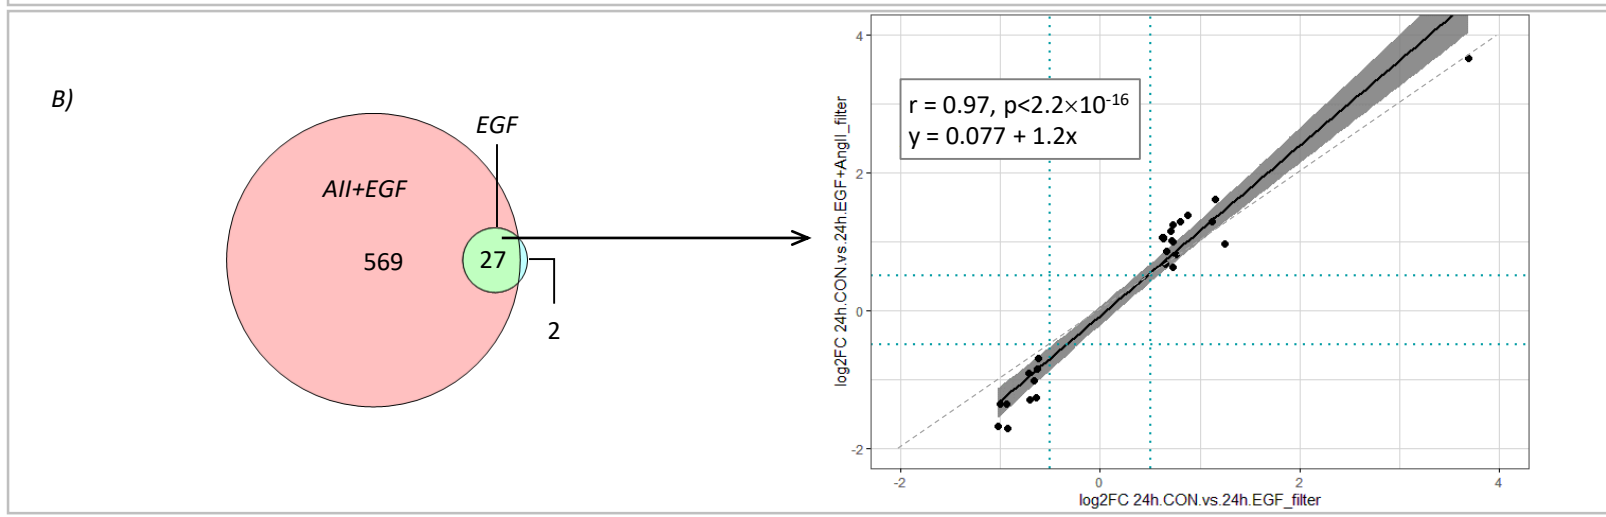

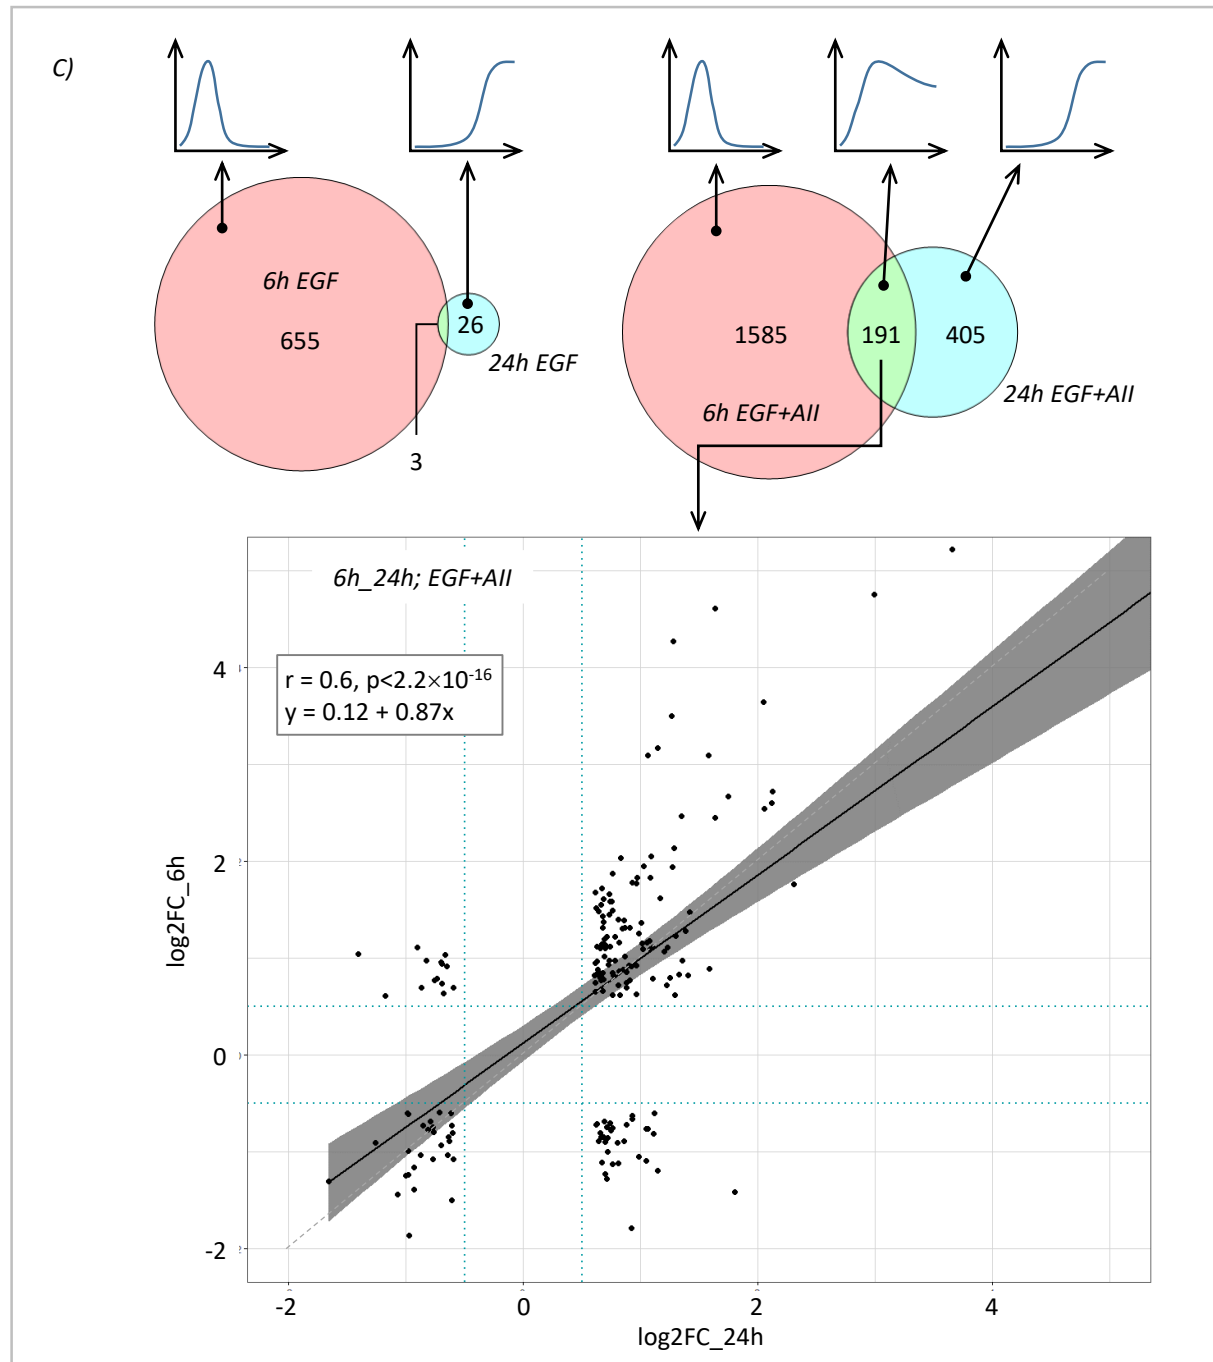

A)

### Upstream Analysis | new (6h)

$$|Z_{E+A, 6h}| > 2 \cup B-H_{E+A, 6h} < 0.01 \cup B-H_{A, 6h} > 0.01 \cup B-H_{E, 6h} > 0.01$$

↳ 72 terms

(B-H<sub>Top33</sub>: AGT, CCND1, CD3, COMMD1, CSF1, EDN1, F2, F7, FSH, GPER1, Ige, IL15, Lh, MAP2K1/2, MASTL, miR-1207-5p, miR-1225-3p, miR-16-5p, miR-296-5p, miR-4640-5p, miR-4755-3p, miR-486-3p, miR-6132, miR-709, miR-7108-3p, NFKB1, NUPR1, Pdgf, PRKCE, TCR, Tgf beta, TGFB3)

### Causal networks | new (6h)

$$|Z_{E+A, 6h}| > 4 \cup B-H_{E+A, 6h} < 10^{-7} \cup B-H_{A, 6h} > 0.01 \cup B-H_{E, 6h} > 0.01$$

↳ 73 terms (50 up, 23 down)

(B-H<sub>Top10-increased</sub>: CHAD, CIRBP, CXCL5, DTNBP1, HTR2A, IGF2R, KIDINS220, NCOA3, NCOA4, ZMIZ1)

(B-H<sub>Top10-decreased</sub>: ADAMTS1, CHMP6, MFN2, mir-133, mir-223, PLPP1, SPRED2, STYX, TLE1, VPS25)

### Diseases & Function | new (6h)

$$|Z_{E+A, 6h}| > 2 \cup B-H_{E+A, 6h} < 0.01 \cup B-H_{A, 6h} > 0.01 \cup B-H_{E, 6h} > 0.01$$

↳ 39 terms

(B-H<sub>Top10</sub>: Cancer, Development of cytoplasm, Fibrogenesis, Formation of brain, Formation of cellular protrusions, Formation of cytoskeleton, Formation of filaments, Lymphatic system tumor, Non-hematological solid tumor, Solid tumor)

B)

## Upstream Analysis | new (24h)

$$|Z_{E+A, 24h}| > 2 \cup B-H_{E+A, 24h} < 0.01$$

↪ 39 terms

(incl. 19 miR predicted to be downregulated; ALDH2, ATF4, CREB1, ERBB2, FGF2, FOS, GPER1, HGF, IFNG, IL1B, IL2, IL5, JUN, MAP2K1, NUPR1, PDGF BB, SP1, TGFB1, Vegf, VEGFA)

## Causal networks | new (24h)

$$|Z_{E+A, 24h}| > 4 \cup B-H_{E+A, 24h} < 10^{-7}$$

↪ 19 terms

(increased: ALOX12, CD14, CD151, DLG3, EGFR, G protein, Lpa receptor, MAP3K11, MAP3K8, MUC4, NRG, TAB3, USP5, Vegf, ZP3; decreased: DDIT3, miR-146a-5p, SOSTDC1, TRIM45)

## Diseases & Function | new (24h)

$$|Z_{E+A, 24h}| > 2 \cup B-H_{E+A, 24h} < 0.01$$

↪ 51 terms

## Causal networks late onset

$$|Z_{E+A, 24h}| > 4 \cup B-H_{E+A, 24h} < 10^{-7} \cup B-H_{E+A, 6h} > 0.01$$

↪ 17 terms

(ALOX12, CD14, CD151, DDIT3, DLG3, G protein, Lpa receptor, MAP3K11, MAP3K8, miR-146a-5p, MUC4, NRG, SOSTDC1, TAB3, TRIM45, USP5, ZP3)

## Diseases & Function late onset

$$|Z_{E+A, 24h}| > 2 \cup B-H_{E+A, 24h} < 0.01 \cup B-H_{E+A, 6h} > 0.01$$

↪ 11 terms:

Apoptosis of retinal cells  
Development of pancreatic tumor  
Endocytosis by eukaryotic cells  
Engulfment of cells  
Infection by RNA virus  
Pancreatic lesion  
Pancreatobiliary tumor  
Uptake of carbohydrate  
Uptake of D-glucose  
Uptake of monosaccharide  
Viral Infection

c)

### Upstream Analysis prolongation

$$\begin{aligned} &|Z_{E+A, 24h}| > 2 \cup B-H_{E+A, 24h} < 0.01 \cup \\ &|Z_{E+A, 6h}| > 2 \cup B-H_{E+A, 6h} < 0.01 \end{aligned}$$

↪ 19 terms

(ATF4, CREB1, ERBB2, FGF2, GPER1, HGF, IFNG, IL1B, IL2, IL5, JUN, MAP2K1, miR-185-3p, NUPR1, PDGF BB, SP1, TGFB1, Vegf, VEGFA)

### Causal networks prolongation

$$\begin{aligned} &|Z_{E+A, 24h}| > 4 \cup B-H_{E+A, 24h} < 10^{-7} \cup B- \\ &H_{E+A, 6h} < 0.01 \end{aligned}$$

↪ 2 terms (EGFR, VEGF)

### Diseases & Function prolongation

$$\begin{aligned} &|Z_{E+A, 24h}| > 2 \cup B-H_{E+A, 24h} < 0.01 \cup B- \\ &H_{E+A, 6h} < 0.01 \end{aligned}$$

↪ 40 terms



**Supplementary Figure SF18.** Effect of EGFR and AT1R on protein expression of genes involved in EGFR-SRF-sigaling in stable transfected HEK293-AT1R clones B6 and D5. Data from 3 independent experiments.

| EGFR          | protein/ $\beta$ -actin ratio |            |             |            |             |            |             |            |
|---------------|-------------------------------|------------|-------------|------------|-------------|------------|-------------|------------|
|               | 6h                            |            |             |            | 24h         |            |             |            |
|               | Ctrl                          | EGF        | Ang II      | E+A        | Ctrl        | EGF        | Ang II      | E+A        |
| <b>B6</b>     |                               |            |             |            |             |            |             |            |
| V20-010       | 4,6                           | 0,8        | 6,0         | 0,7        | 9,8         | 0,1        | 5,0         | 0,0        |
| V20-012       | 48,1                          | 7,8        | 28,9        | 2,3        | 15,5        | 1,3        | 16,9        | 1,6        |
| V20-014       | 14,4                          | 4,1        | 29,2        | 8,1        | 32,3        | 3,2        | 20,1        | 1,1        |
| <b>Mean</b>   | <b>22,4</b>                   | <b>4,2</b> | <b>21,4</b> | <b>3,7</b> | <b>19,2</b> | <b>1,6</b> | <b>14,0</b> | <b>0,9</b> |
| <b>SD</b>     | <b>10,7</b>                   | <b>1,6</b> | <b>6,3</b>  | <b>1,8</b> | <b>5,5</b>  | <b>0,7</b> | <b>3,7</b>  | <b>0,4</b> |
|               |                               |            |             |            |             |            |             |            |
| <b>D5</b>     |                               |            |             |            |             |            |             |            |
| V20-010       | 7,0                           | 1,7        | 7,5         | 1,4        | 10,8        | 0,2        | 5,2         | 0,2        |
| V20-012       | 26,9                          | 7,4        | 62,8        | 11,3       | 54,2        | 4,1        | 39,4        | 2,5        |
| V20-014       | 6,2                           | 7,2        | 44,7        | 6,1        | 68,5        | 5,8        | 35,4        | 2,9        |
| <b>Mean</b>   | <b>13,4</b>                   | <b>5,4</b> | <b>38,3</b> | <b>6,3</b> | <b>44,5</b> | <b>3,4</b> | <b>26,7</b> | <b>1,8</b> |
| <b>SD</b>     | <b>5,5</b>                    | <b>1,5</b> | <b>13,3</b> | <b>2,3</b> | <b>14,2</b> | <b>1,3</b> | <b>8,8</b>  | <b>0,7</b> |
|               |                               |            |             |            |             |            |             |            |
| <b>Elk-1</b>  | protein/ $\beta$ -actin ratio |            |             |            |             |            |             |            |
|               | 6h                            |            |             |            | 24h         |            |             |            |
|               | Ctrl                          | EGF        | Ang II      | E+A        | Ctrl        | EGF        | Ang II      | E+A        |
| <b>B6</b>     |                               |            |             |            |             |            |             |            |
| V20-010       | 0,1                           | 0,1        | 0,0         | 0,1        | 0,1         | 0,1        | 0,1         | 0,0        |
| V20-012       | 1,0                           | 0,9        | 0,9         | 1,0        | 1,0         | 1,0        | 0,8         | 0,8        |
| V20-014       | 0,6                           | 0,5        | 0,8         | 1,0        | 0,7         | 0,6        | 0,5         | 0,5        |
| <b>Mean</b>   | <b>0,5</b>                    | <b>0,5</b> | <b>0,6</b>  | <b>0,7</b> | <b>0,6</b>  | <b>0,6</b> | <b>0,5</b>  | <b>0,5</b> |
| <b>SD</b>     | <b>0,2</b>                    | <b>0,2</b> | <b>0,2</b>  | <b>0,3</b> | <b>0,2</b>  | <b>0,2</b> | <b>0,2</b>  | <b>0,2</b> |
|               |                               |            |             |            |             |            |             |            |
| <b>D5</b>     |                               |            |             |            |             |            |             |            |
| V20-010       | 0,0                           | 0,0        | 0,0         | 0,1        | 0,0         | 0,0        | 0,0         | 0,0        |
| V20-012       | 0,9                           | 1,0        | 1,0         | 1,3        | 0,6         | 0,6        | 0,8         | 0,8        |
| V20-014       | 0,5                           | 0,5        | 0,6         | 0,8        | 0,4         | 0,4        | 0,4         | 0,5        |
| <b>Mean</b>   | <b>0,5</b>                    | <b>0,5</b> | <b>0,6</b>  | <b>0,7</b> | <b>0,3</b>  | <b>0,4</b> | <b>0,4</b>  | <b>0,4</b> |
| <b>SD</b>     | <b>0,2</b>                    | <b>0,2</b> | <b>0,2</b>  | <b>0,3</b> | <b>0,1</b>  | <b>0,1</b> | <b>0,2</b>  | <b>0,2</b> |
|               |                               |            |             |            |             |            |             |            |
| <b>pElk-1</b> | pElk-1/Elk-1                  |            |             |            |             |            |             |            |
|               | 6h                            |            |             |            | 24h         |            |             |            |
|               | Ctrl                          | EGF        | Ang II      | E+A        | Ctrl        | EGF        | Ang II      | E+A        |
| <b>B6</b>     |                               |            |             |            |             |            |             |            |
| V20-010       | 0,7                           | 0,7        | 1,1         | 0,7        | 0,8         | 0,7        | 0,6         | 0,5        |
| V20-012       | 0,3                           | 0,2        | 0,4         | 0,2        | 0,4         | 0,4        | 0,4         | 0,3        |
| V20-014       | 0,3                           | 0,3        | 0,3         | 0,3        | 0,5         | 0,4        | 0,4         | 0,3        |
| <b>Mean</b>   | <b>0,4</b>                    | <b>0,4</b> | <b>0,6</b>  | <b>0,4</b> | <b>0,6</b>  | <b>0,5</b> | <b>0,5</b>  | <b>0,3</b> |
| <b>SD</b>     | <b>0,1</b>                    | <b>0,1</b> | <b>0,2</b>  | <b>0,1</b> | <b>0,1</b>  | <b>0,1</b> | <b>0,1</b>  | <b>0,1</b> |
|               |                               |            |             |            |             |            |             |            |
| <b>D5</b>     |                               |            |             |            |             |            |             |            |
| V20-010       | 0,9                           | 0,7        | 0,8         | 0,7        | 1,0         | 0,9        | 0,9         | 0,7        |
| V20-012       | 0,2                           | 0,2        | 0,2         | 0,2        | 0,3         | 0,2        | 0,2         | 0,4        |
| V20-014       | 0,3                           | 0,4        | 0,4         | 0,4        | 0,9         | 1,1        | 1,2         | 1,7        |
| <b>Mean</b>   | <b>0,5</b>                    | <b>0,4</b> | <b>0,4</b>  | <b>0,4</b> | <b>0,7</b>  | <b>0,7</b> | <b>0,8</b>  | <b>0,9</b> |
| <b>SD</b>     | <b>0,2</b>                    | <b>0,1</b> | <b>0,1</b>  | <b>0,1</b> | <b>0,2</b>  | <b>0,2</b> | <b>0,2</b>  | <b>0,3</b> |

| myocardin     | protein/ $\beta$ -actin ratio |             |             |             |             |             |             |             |
|---------------|-------------------------------|-------------|-------------|-------------|-------------|-------------|-------------|-------------|
|               | 6h                            |             |             |             | 24h         |             |             |             |
|               | Ctrl                          | EGF         | Ang II      | E+A         | Ctrl        | EGF         | Ang II      | E+A         |
| <b>B6</b>     |                               |             |             |             |             |             |             |             |
| V20-010       | 8,4                           | 6,2         | 3,7         | 4,5         | 1,9         | 1,1         | 0,7         | 0,4         |
| V20-012       | 23,7                          | 22,3        | 22,1        | 18,8        | 23,0        | 16,1        | 16,2        | 18,0        |
| V20-014       | 33,3                          | 20,7        | 23,6        | 17,8        | 14,0        | 18,7        | 18,0        | 12,3        |
| <b>Mean</b>   | <b>21,8</b>                   | <b>16,4</b> | <b>16,5</b> | <b>13,7</b> | <b>13,0</b> | <b>12,0</b> | <b>11,6</b> | <b>10,2</b> |
| <b>SD</b>     | <b>5,9</b>                    | <b>4,2</b>  | <b>5,2</b>  | <b>3,8</b>  | <b>5,0</b>  | <b>4,5</b>  | <b>4,5</b>  | <b>4,2</b>  |
|               |                               |             |             |             |             |             |             |             |
| <b>D5</b>     |                               |             |             |             |             |             |             |             |
| V20-010       | 11,7                          | 5,9         | 6,2         | 7,5         | 7,0         | 6,9         | 4,3         | 13,8        |
| V20-012       | 17,2                          | 19,3        | 19,9        | 17,6        | 14,4        | 8,4         | 6,2         | 8,2         |
| V20-014       | 21,6                          | 13,8        | 14,5        | 11,9        | 8,7         | 9,2         | 11,7        | 11,8        |
| <b>Mean</b>   | <b>16,8</b>                   | <b>13,0</b> | <b>13,5</b> | <b>12,3</b> | <b>10,0</b> | <b>8,2</b>  | <b>7,4</b>  | <b>11,3</b> |
| <b>SD</b>     | <b>2,4</b>                    | <b>3,2</b>  | <b>3,2</b>  | <b>2,4</b>  | <b>1,8</b>  | <b>0,6</b>  | <b>1,8</b>  | <b>1,3</b>  |
|               |                               |             |             |             |             |             |             |             |
| <b>MRTF-A</b> | protein/ $\beta$ -actin ratio |             |             |             |             |             |             |             |
|               | 6h                            |             |             |             | 24h         |             |             |             |
|               | Ctrl                          | EGF         | Ang II      | E+A         | Ctrl        | EGF         | Ang II      | E+A         |
| <b>B6</b>     |                               |             |             |             |             |             |             |             |
| V20-010       | 3,3                           | 8,2         | 7,5         | 8,4         | 6,2         | 5,1         | 4,7         | 1,4         |
| V20-012       | 10,8                          | 20,1        | 27,7        | 26,0        | 27,7        | 7,4         | 5,1         | 10,5        |
| V20-014       | 17,2                          | 17,8        | 15,2        | 17,0        | 15,2        | 16,8        | 15,0        | 10,2        |
| <b>Mean</b>   | <b>10,4</b>                   | <b>15,4</b> | <b>16,8</b> | <b>17,1</b> | <b>16,4</b> | <b>9,7</b>  | <b>8,3</b>  | <b>7,4</b>  |
| <b>SD</b>     | <b>3,3</b>                    | <b>3,0</b>  | <b>4,8</b>  | <b>4,1</b>  | <b>5,1</b>  | <b>2,9</b>  | <b>2,8</b>  | <b>2,4</b>  |
|               |                               |             |             |             |             |             |             |             |
| <b>D5</b>     |                               |             |             |             |             |             |             |             |
| V20-010       | 3,2                           | 4,9         | 5,0         | 2,7         | 6,1         | 5,0         | 3,9         | 2,6         |
| V20-012       | 14,3                          | 13,5        | 10,1        | 14,7        | 16,5        | 11,1        | 13,6        | 8,8         |
| V20-014       | 8,1                           | 7,3         | 11,6        | 12,2        | 15,9        | 10,4        | 6,9         | 5,1         |
| <b>Mean</b>   | <b>8,5</b>                    | <b>8,6</b>  | <b>8,9</b>  | <b>9,9</b>  | <b>12,8</b> | <b>8,8</b>  | <b>8,1</b>  | <b>5,5</b>  |
| <b>SD</b>     | <b>2,6</b>                    | <b>2,1</b>  | <b>1,6</b>  | <b>3,0</b>  | <b>2,8</b>  | <b>1,6</b>  | <b>2,3</b>  | <b>1,5</b>  |
|               |                               |             |             |             |             |             |             |             |
| <b>MRTF-B</b> | protein/ $\beta$ -actin ratio |             |             |             |             |             |             |             |
|               | 6h                            |             |             |             | 24h         |             |             |             |
|               | Ctrl                          | EGF         | Ang II      | E+A         | Ctrl        | EGF         | Ang II      | E+A         |
| <b>B6</b>     |                               |             |             |             |             |             |             |             |
| V20-010       | 5,1                           | 4,8         | 8,1         | 11,5        | 10,6        | 9,6         | 4,7         | 2,0         |
| V20-012       | 17,6                          | 15,1        | 24,0        | 31,6        | 28,2        | 20,5        | 15,0        | 6,1         |
| V20-014       | 17,1                          | 23,7        | 32,1        | 35,4        | 32,7        | 35,8        | 28,6        | 13,1        |
| <b>Mean</b>   | <b>13,3</b>                   | <b>14,5</b> | <b>21,4</b> | <b>26,2</b> | <b>23,9</b> | <b>21,9</b> | <b>16,1</b> | <b>7,1</b>  |
| <b>SD</b>     | <b>3,3</b>                    | <b>4,5</b>  | <b>5,7</b>  | <b>6,0</b>  | <b>5,5</b>  | <b>6,2</b>  | <b>5,6</b>  | <b>2,6</b>  |
|               |                               |             |             |             |             |             |             |             |
| <b>D5</b>     |                               |             |             |             |             |             |             |             |
| V20-010       | 11,2                          | 8,2         | 5,4         | 8,0         | 12,2        | 7,7         | 4,6         | 4,7         |
| V20-012       | 10,2                          | 10,2        | 11,8        | 15,5        | 17,2        | 10,1        | 6,5         | 6,9         |
| V20-014       | 14,5                          | 15,8        | 23,0        | 26,7        | 14,6        | 15,6        | 17,4        | 8,9         |
| <b>Mean</b>   | <b>12,0</b>                   | <b>11,4</b> | <b>13,4</b> | <b>16,7</b> | <b>14,7</b> | <b>11,1</b> | <b>9,5</b>  | <b>6,9</b>  |
| <b>SD</b>     | <b>1,1</b>                    | <b>1,9</b>  | <b>4,2</b>  | <b>4,4</b>  | <b>1,2</b>  | <b>1,9</b>  | <b>3,3</b>  | <b>1,0</b>  |

**Supplementary Figure SF19.** Synergistic effect of EGFR and AT1R on (A) AP1- and (B) EGR--mediated transcriptional activity in HEK293 cells transiently transfected with AT1R. 1 nmol/l AII, 10 µg/l EGF, N(AP1) = 12, N(EGR) = 24. \* = p<0.05. (C) ARC protein upregulation by EGF (E) + angiotensin II (A) is prevented to a large extent by U0126 (U) +latrunculin B (L). N=4.

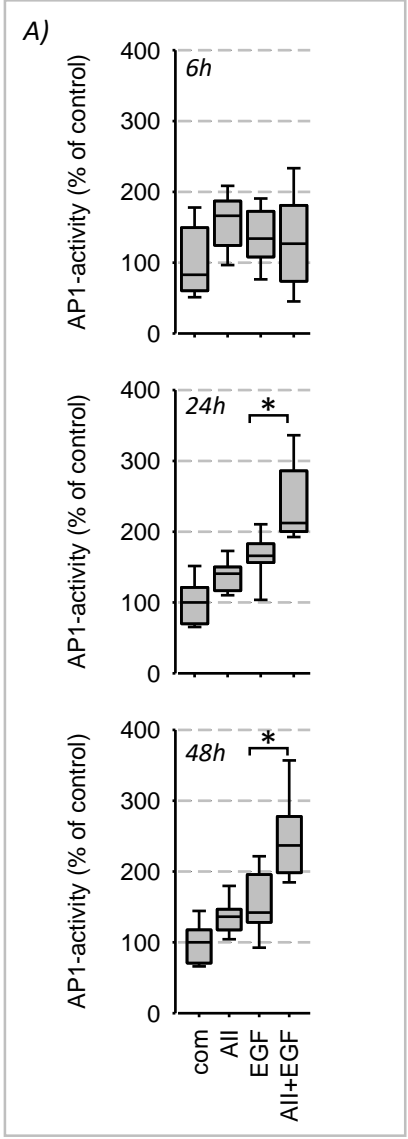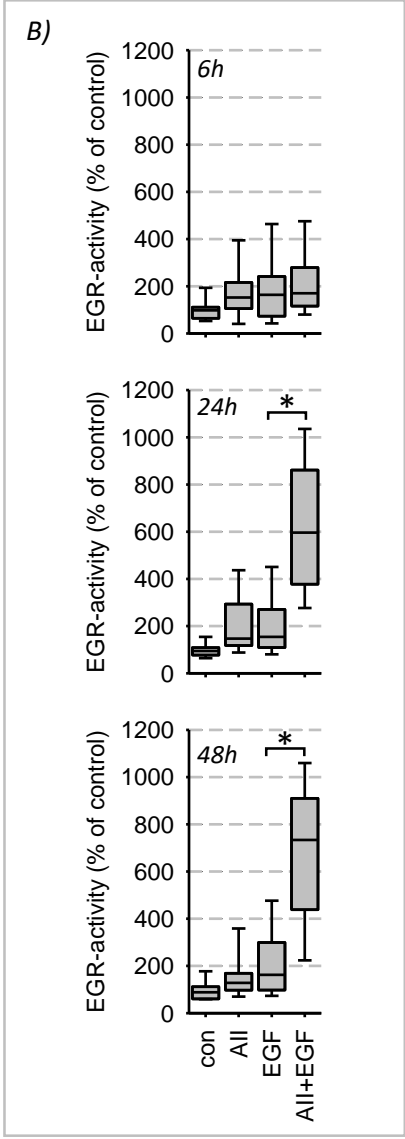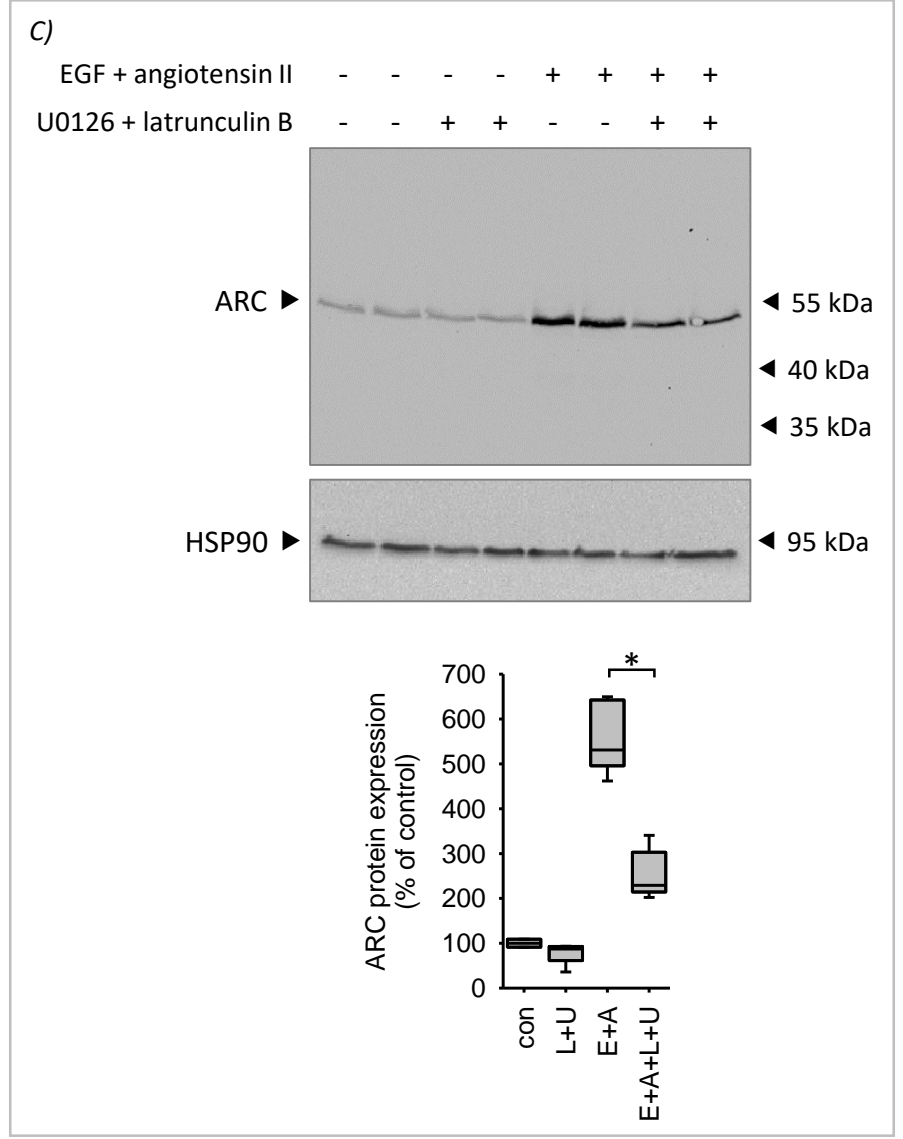

Supplementary Figure SF20. Graphical summary of AT1R-EGFR-synergism and information flow.

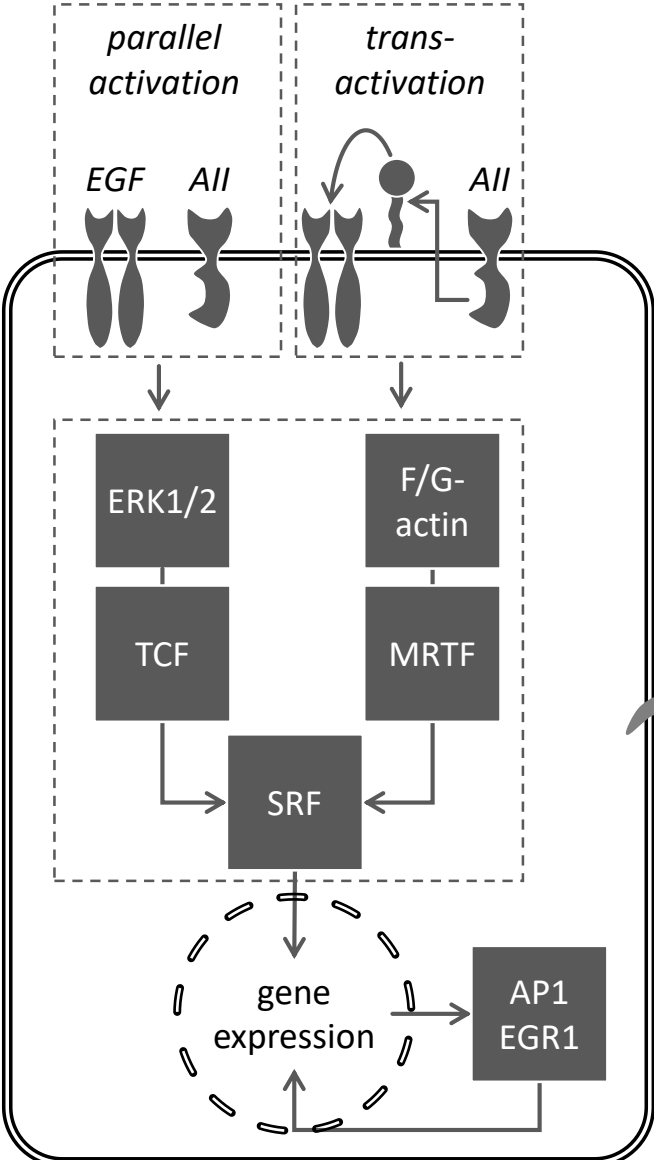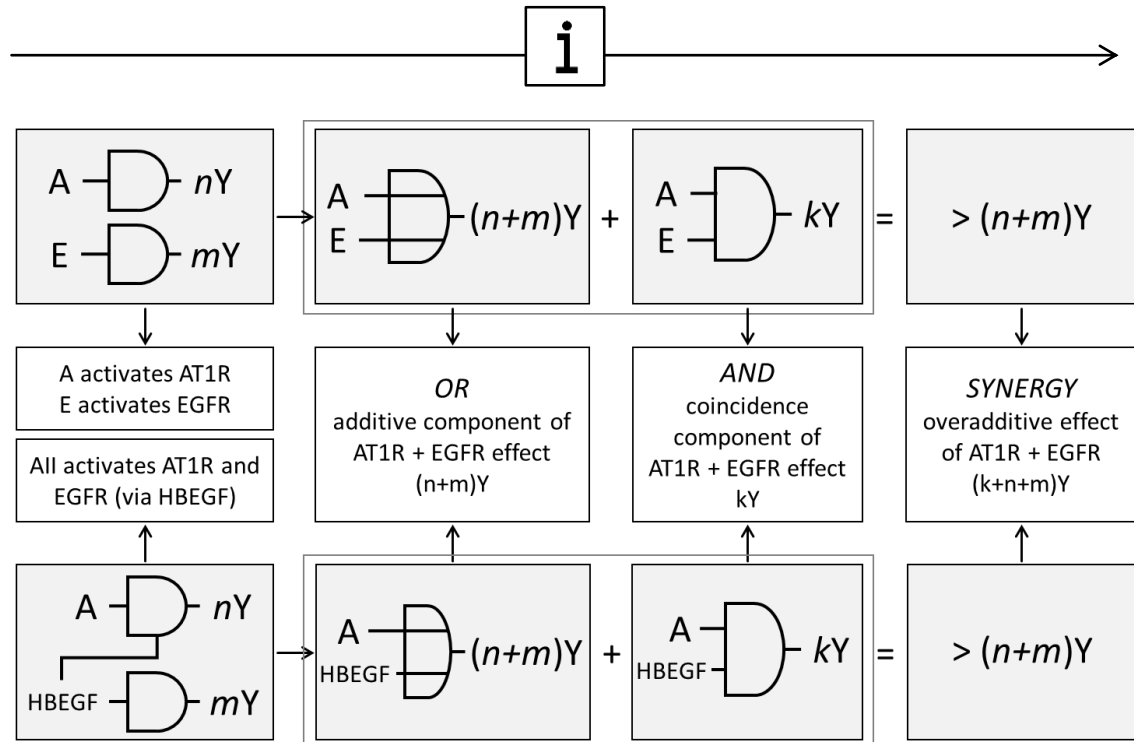

Supplement: 18_2021_4065_MOESM7_ESM.pdf [file 18_2021_4065_MOESM7_ESM.pdf]
